# Supplementary material for: Square planar mononuclear Ni(ii) complexes of functionalized 2,2′:6′,2′′-terpyridines: BSA/DNA binding and anticancer activity
Source: Royal Society of Chemistry journal article supplement (doi:10.1039/d4nj03874f), 2025-01-01
Supplement: d4nj03874f1.pdf [file d4nj03874f1.pdf]

## Supplementary Information

### Square Planar Mononuclear Ni(II) Complexes of Functionalized 2,2':6',2''- Terpyridines: BSA/DNA Binding and Anticancer Activity

Rakesh R Panicker, Martin Luther John, Daphne Morrison N, Pralayakaveri Yogendra Varma, Dharani S, Chayan Pandya, A. S. Vijai Anand, Joydip Mondal, Akella Sivaramakrishna\*

Department of Chemistry, School of Advanced Sciences, Vellore Institute of Technology, Vellore 632014, Tamil Nadu, India

E-mail: [asrkrishna@vit.ac.in](mailto:asrkrishna@vit.ac.in)

#### List of Figures

| Contents                                                       | Page No. |
|----------------------------------------------------------------|----------|
| <b>Figure S1.</b> <sup>1</sup> H NMR Spectrum of compound L1   | 7        |
| <b>Figure S2.</b> <sup>13</sup> C NMR Spectrum of compound L1  | 7        |
| <b>Figure S3.</b> IR Spectrum of compound L1                   | 8        |
| <b>Figure S4.</b> ESI-Mass Spectrum of compound L1             | 8        |
| <b>Figure S5.</b> <sup>1</sup> H NMR Spectrum of compound L2   | 9        |
| <b>Figure S6.</b> <sup>13</sup> C NMR Spectrum of compound L2  | 9        |
| <b>Figure S7.</b> IR Spectrum of compound L2                   | 10       |
| <b>Figure S8.</b> ESI-Mass Spectrum of compound L2             | 10       |
| <b>Figure S9.</b> <sup>1</sup> H NMR Spectrum of compound L3   | 11       |
| <b>Figure S10.</b> <sup>13</sup> C NMR Spectrum of compound L3 | 11       |
| <b>Figure S11.</b> IR Spectrum of compound L3                  | 12       |
| <b>Figure S12.</b> ESI-Mass Spectrum of compound L3            | 12       |
| <b>Figure S13.</b> <sup>1</sup> H NMR Spectrum of compound L4  | 13       |
| <b>Figure S14.</b> <sup>13</sup> C NMR Spectrum of compound L4 | 13       |
| <b>Figure S15.</b> IR Spectrum of compound L4                  | 14       |
| <b>Figure S16.</b> ESI-Mass Spectrum of compound L4            | 14       |

|                                                                                                                                                                                                           |           |
|-----------------------------------------------------------------------------------------------------------------------------------------------------------------------------------------------------------|-----------|
| <b>Figure S17.</b> IR Spectrum of compound <b>NiL1</b>                                                                                                                                                    | <b>15</b> |
| <b>Figure S18.</b> ESI-Mass Spectrum of compound <b>NiL1</b>                                                                                                                                              | <b>15</b> |
| <b>Figure S19.</b> IR Spectrum of compound <b>NiL2</b>                                                                                                                                                    | <b>16</b> |
| <b>Figure S20.</b> ESI-Mass Spectrum of compound <b>NiL2</b>                                                                                                                                              | <b>16</b> |
| <b>Figure S21.</b> IR Spectrum of compound <b>NiL3</b>                                                                                                                                                    | <b>17</b> |
| <b>Figure S22.</b> ESI-Mass Spectrum of compound <b>NiL3</b>                                                                                                                                              | <b>17</b> |
| <b>Figure S23.</b> IR Spectrum of compound <b>NiL4</b>                                                                                                                                                    | <b>18</b> |
| <b>Figure S24.</b> ESI-Mass Spectrum of compound <b>NiL4</b>                                                                                                                                              | <b>18</b> |
| <b>Figure S25.</b> UV-Visible Spectra of compound <b>L1</b> and <b>NiL1</b>                                                                                                                               | <b>19</b> |
| <b>Figure S26.</b> UV-Visible Spectra of compound <b>L2</b> and <b>NiL2</b>                                                                                                                               | <b>19</b> |
| <b>Figure S27.</b> UV-Visible Spectra of compound <b>L3</b> and <b>NiL3</b>                                                                                                                               | <b>20</b> |
| <b>Figure S28.</b> UV-Visible Spectra of compound <b>L4</b> and <b>NiL4</b>                                                                                                                               | <b>20</b> |
| <b>Figure S29.</b> Stability studies of <b>L1-L4</b> (In order a-d) using UV-Visible absorption spectral data ( $1 \times 10^{-5}$ M) in 0.1 mM glutathione (GSH)                                         | <b>21</b> |
| <b>Figure S30.</b> Stability studies of <b>NiL1-NiL4</b> (In order a-d) using UV-Visible absorption spectral data ( $1 \times 10^{-5}$ M) in 0.1 mM glutathione (GSH)                                     | <b>21</b> |
| <b>Figure S31.</b> Stability studies of <b>L1-L4</b> (In order a-d) using UV-Visible absorption spectral data ( $1 \times 10^{-5}$ M) under MTT conditions ( <i>i.e.</i> 5% DMSO in phosphate buffer)     | <b>22</b> |
| <b>Figure S32.</b> Stability studies of <b>NiL1-NiL4</b> (In order a-d) using UV-Visible absorption spectral data ( $1 \times 10^{-5}$ M) under MTT conditions ( <i>i.e.</i> 5% DMSO in phosphate buffer) | <b>22</b> |
| <b>Figure S33.</b> Stability studies of <b>L1-L4</b> (In order a-d) using UV-Visible absorption spectral data ( $1 \times 10^{-5}$ M) in water                                                            | <b>23</b> |
| <b>Figure S34.</b> Stability studies of <b>NiL1-NiL4</b> (In order a-d) using UV-Visible absorption spectral data ( $1 \times 10^{-5}$ M) in water                                                        | <b>23</b> |
| <b>Figure S35.</b> Frontier molecular orbitals of the complexes <b>L1</b> (a), <b>L2</b> (b), <b>L3</b> (c) and <b>L4</b> (d)                                                                             | <b>24</b> |
| <b>Figure S36</b> The ESP mapped on the surface of the ligand <b>L1</b>                                                                                                                                   | <b>24</b> |

|                                                                                                                                                                           |           |
|---------------------------------------------------------------------------------------------------------------------------------------------------------------------------|-----------|
| (a), L2 (b), L3 (c) and L4 (d) by the DFT-B3LYP method                                                                                                                    |           |
| <b>Figure S37</b> Molecular docking interactions of ligands with BSA                                                                                                      | <b>25</b> |
| <b>Figure S38</b> Molecular docking interactions of ligands with Im-17-3                                                                                                  | <b>25</b> |
| <b>Figure S39.</b> Molecular docking interactions of ligands with DNA (AT Rich)                                                                                           | <b>26</b> |
| <b>Figure S40.</b> Molecular docking interactions of ligands with DNA (GC Rich)                                                                                           | <b>26</b> |
| <b>Figure S41.</b> Molecular docking interactions of ligands with DNA (Mixed)                                                                                             | <b>27</b> |
| <b>Figure S42.</b> Molecular docking interactions of complexes NiL1 (a), NiL2 (b), NiL4 (c) with DNA (AT Rich)                                                            | <b>27</b> |
| <b>Figure S43.</b> Molecular docking interactions of complexes NiL1 (a), NiL2 (b), NiL4 (c) with DNA (GC Rich)                                                            | <b>28</b> |
| <b>Figure S44.</b> Molecular docking interactions of complexes NiL1 (a), NiL2 (b), NiL4 (c) with DNA (Mixed)                                                              | <b>29</b> |
| <b>Figure S45.</b> UV-Visible response of L1 ( $1.0 \times 10^{-5}$ ) at pH 7.2 in 5 mM Tris-HCl-NaCl buffer solution in the presence of incremental addition of CT-DNA   | <b>30</b> |
| <b>Figure S46.</b> UV-Visible response of NiL1 ( $1.0 \times 10^{-5}$ ) at pH 7.2 in 5 mM Tris-HCl-NaCl buffer solution in the presence of incremental addition of CT-DNA | <b>30</b> |
| <b>Figure S47.</b> UV-Visible response of L2 ( $1.0 \times 10^{-5}$ ) at pH 7.2 in 5 mM Tris-HCl-NaCl buffer solution in the presence of incremental addition of CT-DNA   | <b>31</b> |
| <b>Figure S48.</b> UV-Visible response of NiL2 ( $1.0 \times 10^{-5}$ ) at pH 7.2 in 5 mM Tris-HCl-NaCl buffer solution in the presence of incremental addition of CT-DNA | <b>31</b> |
| <b>Figure S49</b> UV-Visible response of L3 ( $1.0 \times 10^{-5}$ ) at pH 7.2 in 5 mM Tris-HCl-NaCl buffer solution in the presence of incremental addition of CT-DNA    | <b>32</b> |
| <b>Figure S50.</b> UV-Visible response of NiL3 ( $1.0 \times 10^{-5}$ ) at pH 7.2 in 5 mM Tris-HCl-NaCl buffer solution in the presence of                                | <b>32</b> |

|                                                                                                                                                                                  |           |
|----------------------------------------------------------------------------------------------------------------------------------------------------------------------------------|-----------|
| incremental addition of CT-DNA                                                                                                                                                   |           |
| <b>Figure S51.</b> UV-Visible response of <b>L4</b> ( $1.0 \times 10^{-5}$ ) at pH 7.2 in 5 mM Tris-HCl-NaCl buffer solution in the presence of incremental addition of CT-DNA   | <b>33</b> |
| <b>Figure S52.</b> UV-Visible response of <b>NiL4</b> ( $1.0 \times 10^{-5}$ ) at pH 7.2 in 5 mM Tris-HCl-NaCl buffer solution in the presence of incremental addition of CT-DNA | <b>33</b> |
| <b>Figure S53</b> Binding parameters of interaction of the ligand ( <b>L1</b> ) with BSA                                                                                         | <b>34</b> |
| <b>Figure S54</b> Binding parameters of interaction of the ligand ( <b>NiL1</b> ) with BSA                                                                                       | <b>34</b> |
| <b>Figure S55</b> Binding parameters of interaction of the ligand ( <b>L2</b> ) with BSA                                                                                         | <b>34</b> |
| <b>Figure S56</b> Binding parameters of interaction of the ligand ( <b>NiL2</b> ) with BSA                                                                                       | <b>35</b> |
| <b>Figure S57</b> Binding parameters of interaction of the ligand ( <b>L3</b> ) with BSA                                                                                         | <b>35</b> |
| <b>Figure S58</b> Binding parameters of interaction of the ligand ( <b>NiL3</b> ) with BSA                                                                                       | <b>35</b> |
| <b>Figure S59</b> Binding parameters of interaction of the ligand ( <b>L4</b> ) with BSA                                                                                         | <b>36</b> |
| <b>Figure S60</b> Binding parameters of interaction of the ligand ( <b>NiL4</b> ) with BSA                                                                                       | <b>36</b> |
| <b>Figure S61</b> Fluorescence spectral response of the EtBr-DNA at pH 7.2 in the presence of <b>L1</b>                                                                          | <b>37</b> |
| <b>Figure S62</b> Fluorescence spectral response of the EtBr-DNA at pH 7.2 in the presence of <b>NiL1</b>                                                                        | <b>37</b> |



|                                                                                                                                                                                                                                               |           |
|-----------------------------------------------------------------------------------------------------------------------------------------------------------------------------------------------------------------------------------------------|-----------|
| <b>Figure S63</b> Fluorescence spectral response of the EtBr-DNA at pH 7.2 in the presence of <b>L2</b>                                                                                                                                       | <b>38</b> |
| <b>Figure S64</b> Fluorescence spectral response of the EtBr-DNA at pH 7.2 in the presence of <b>NiL2</b>                                                                                                                                     | <b>38</b> |
| <b>Figure S65</b> Fluorescence spectral response of the EtBr-DNA at pH 7.2 in the presence of <b>L3</b>                                                                                                                                       | <b>39</b> |
| <b>Figure S66</b> Fluorescence spectral response of the EtBr-DNA at pH 7.2 in the presence of <b>NiL3</b>                                                                                                                                     | <b>39</b> |
| <b>Figure S67</b> Fluorescence spectral response of the EtBr-DNA at pH 7.2 in the presence of <b>L4</b>                                                                                                                                       | <b>40</b> |
| <b>Figure S68</b> Fluorescence spectral response of the EtBr-DNA at pH 7.2 in the presence of <b>NiL4</b>                                                                                                                                     | <b>40</b> |
| <b>Figure S69.</b> Sigmoidal plot for finding the IC <sub>50</sub> Values of the Ni(II) complexes <b>NiL1-NiL4</b> (In order a-d) and using the standard drug Cisplatin (e) using Hep-G2 cell line. f) Sigmoidal plot for the Vero cell line. | <b>41</b> |

### List of Tables

| <b>Contents</b>                                                                                                                      | <b>Page No.</b> |
|--------------------------------------------------------------------------------------------------------------------------------------|-----------------|
| <b>Table S1</b> Binding energy values of the synthesized ligands and complexes with BSA, 1m17-3 and DNA (AT Rich, GC Rich and Mixed) | <b>24</b>       |
| <b>Table S2</b> Crystallographic data refinement details of the ligand <b>L4</b> and the Ni(II) complex <b>NiL4</b>                  | <b>42</b>       |

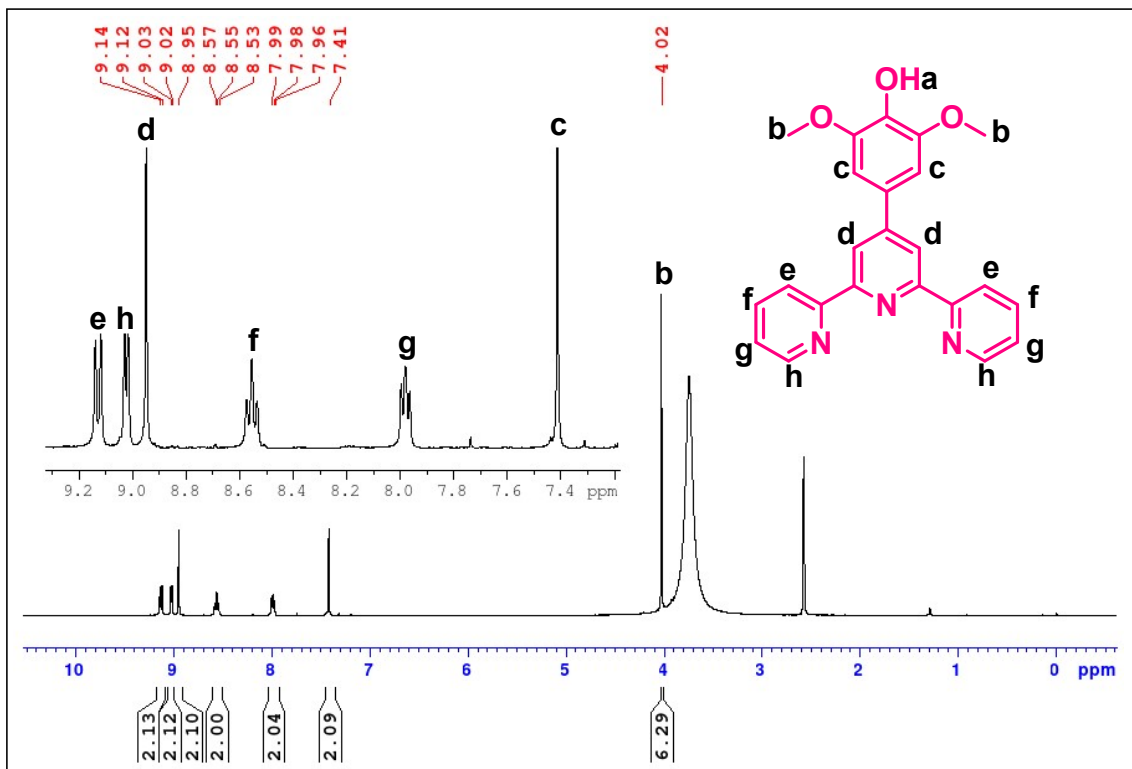

Figure S1. <sup>1</sup>H NMR Spectrum of compound L1

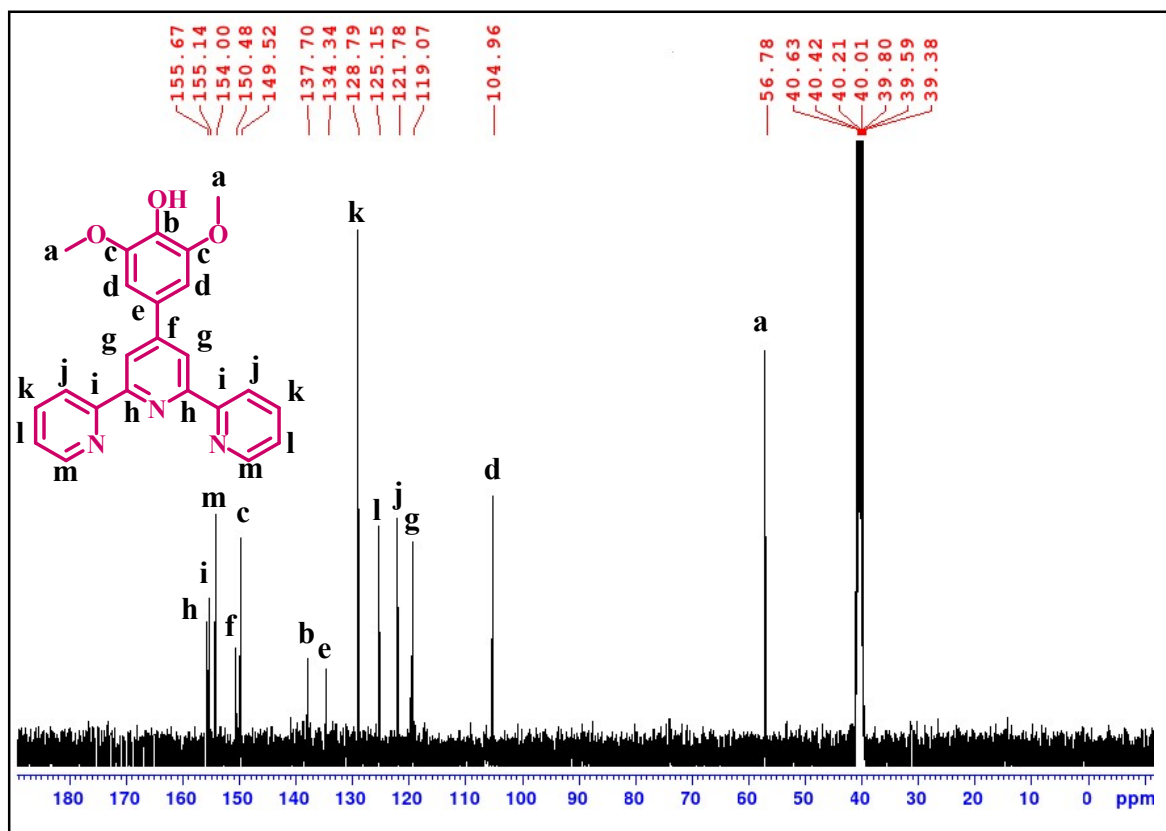

Figure S2.  $^{13}\text{C}$  NMR Spectrum of compound L1

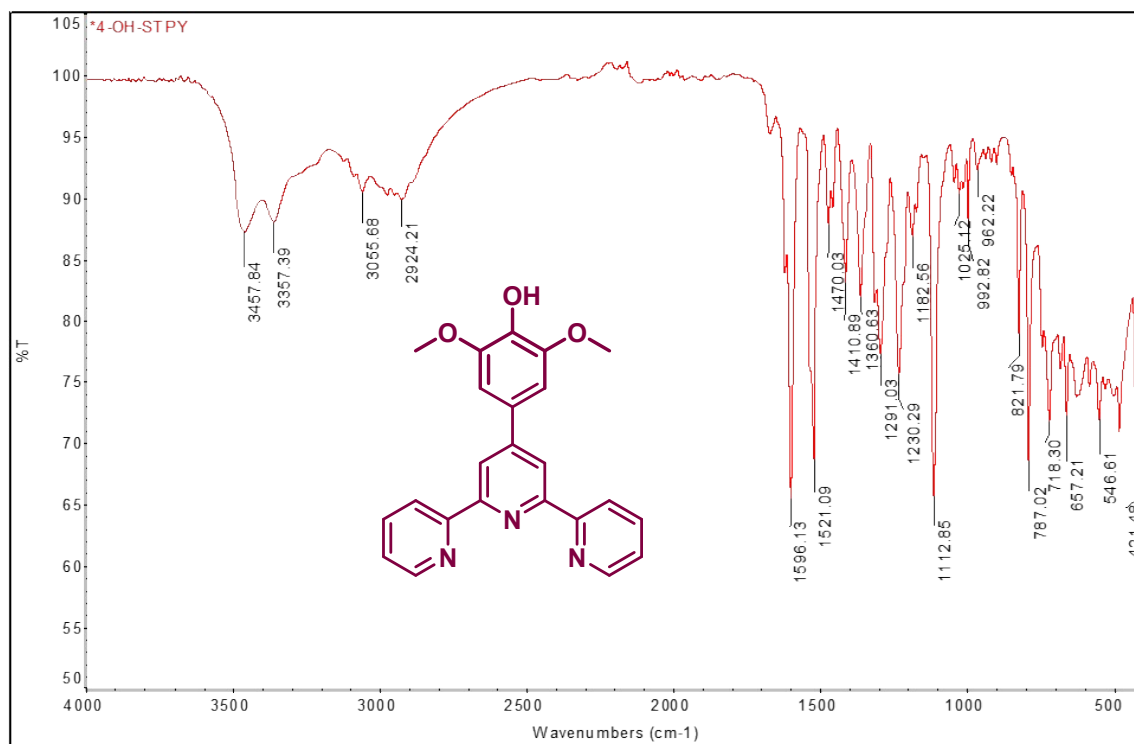

Figure S3. IR Spectrum of compound L1

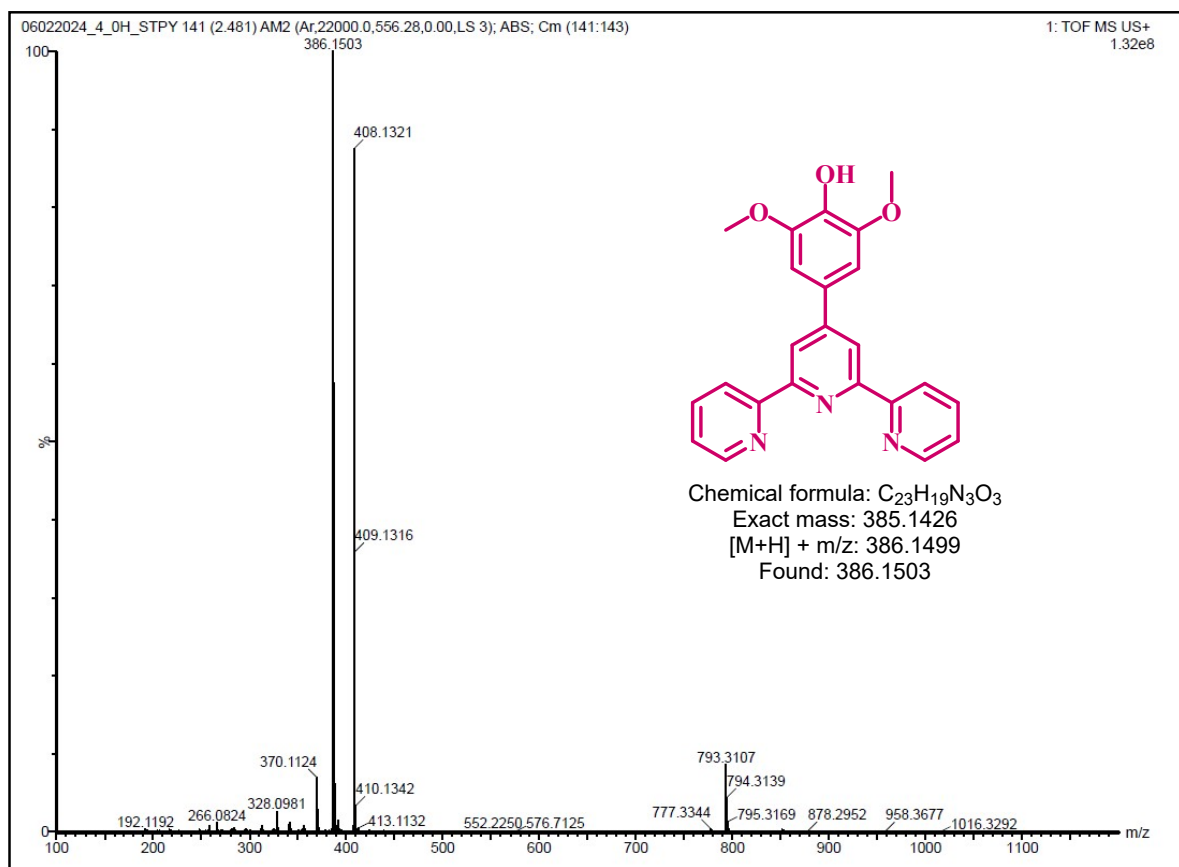

Figure S4. ESI-Mass Spectrum of compound L1

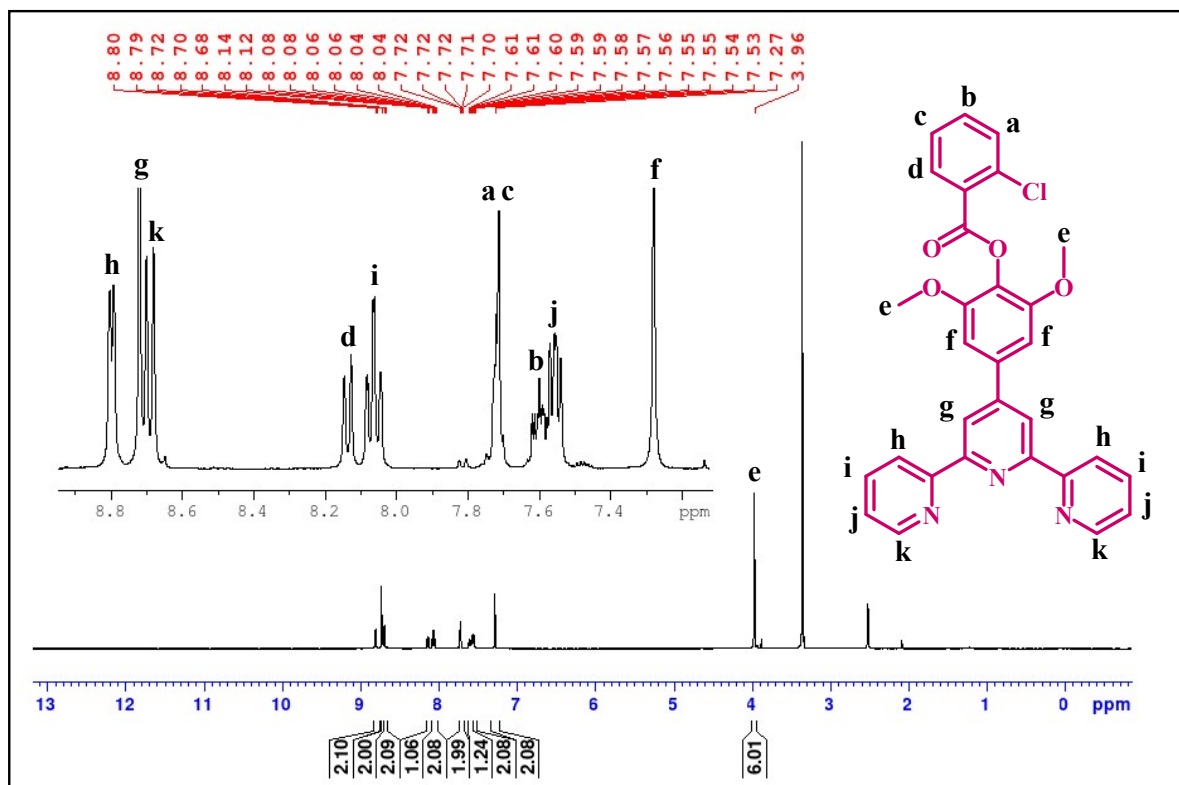

Figure S5.  $^1\text{H}$  NMR Spectrum of compound L2

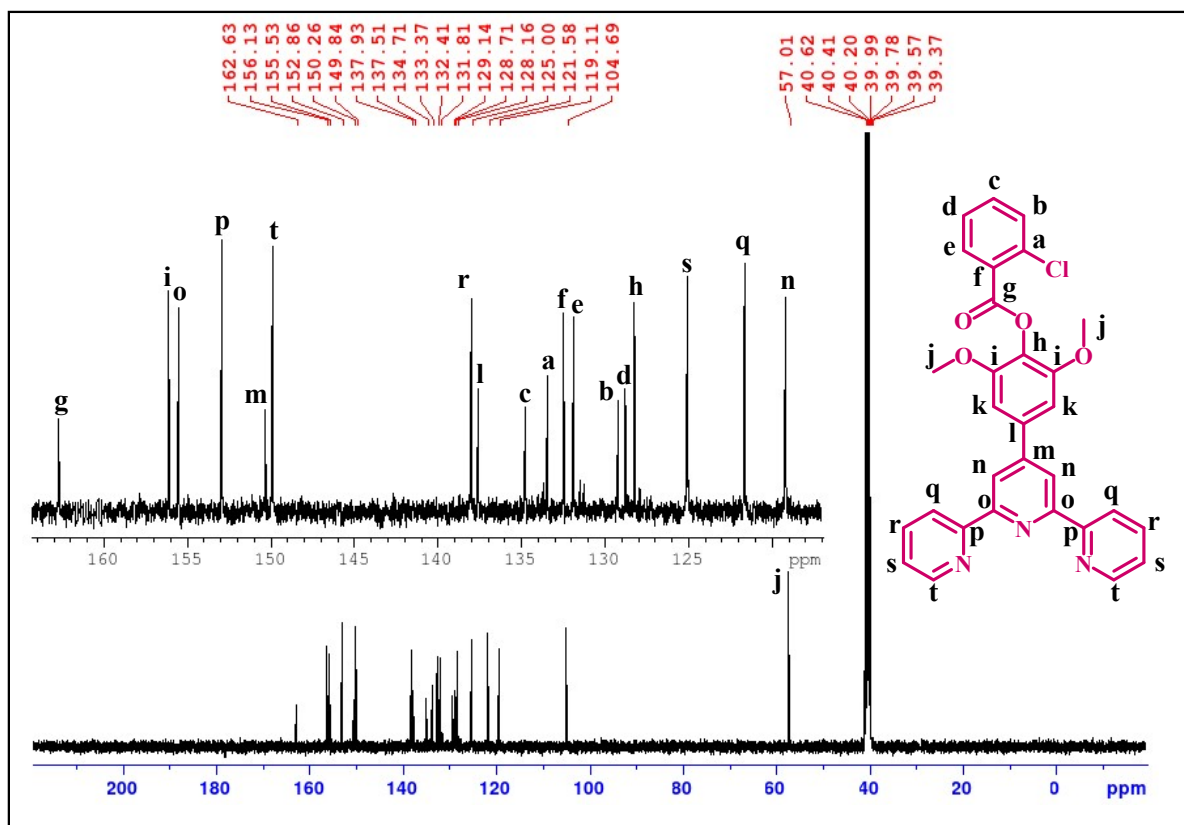

Figure S6.  $^{13}\text{C}$  NMR Spectrum of compound L2

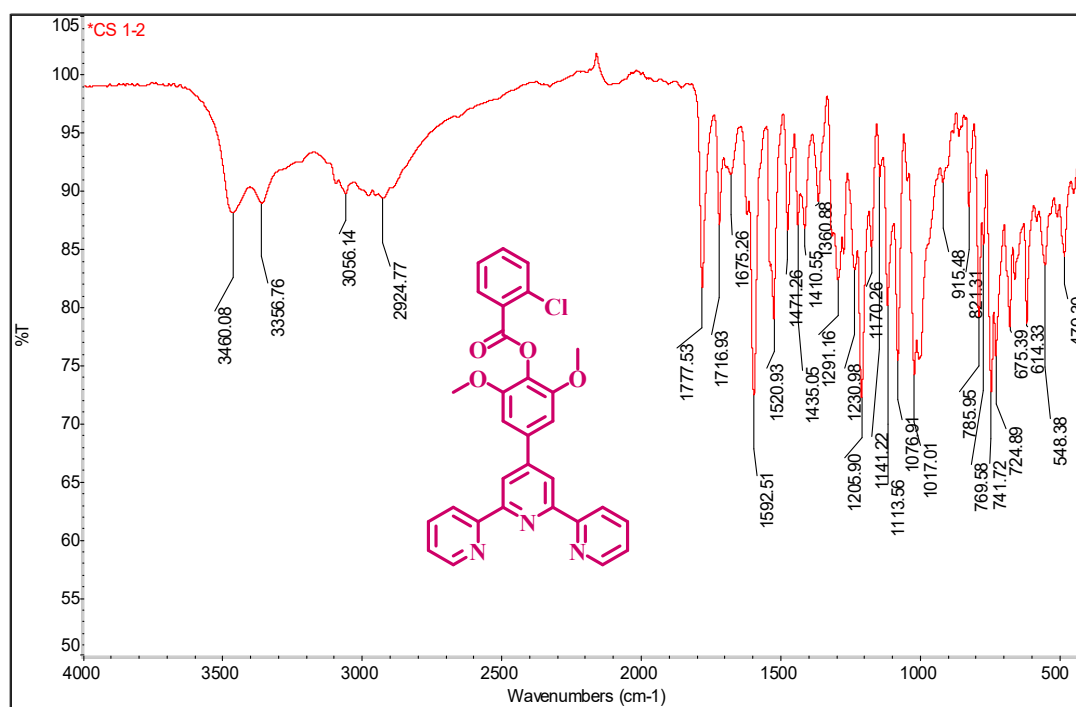

Figure S7. IR Spectrum of compound L2

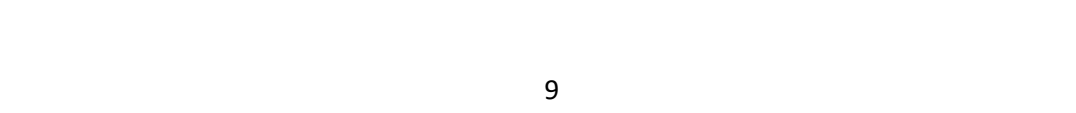

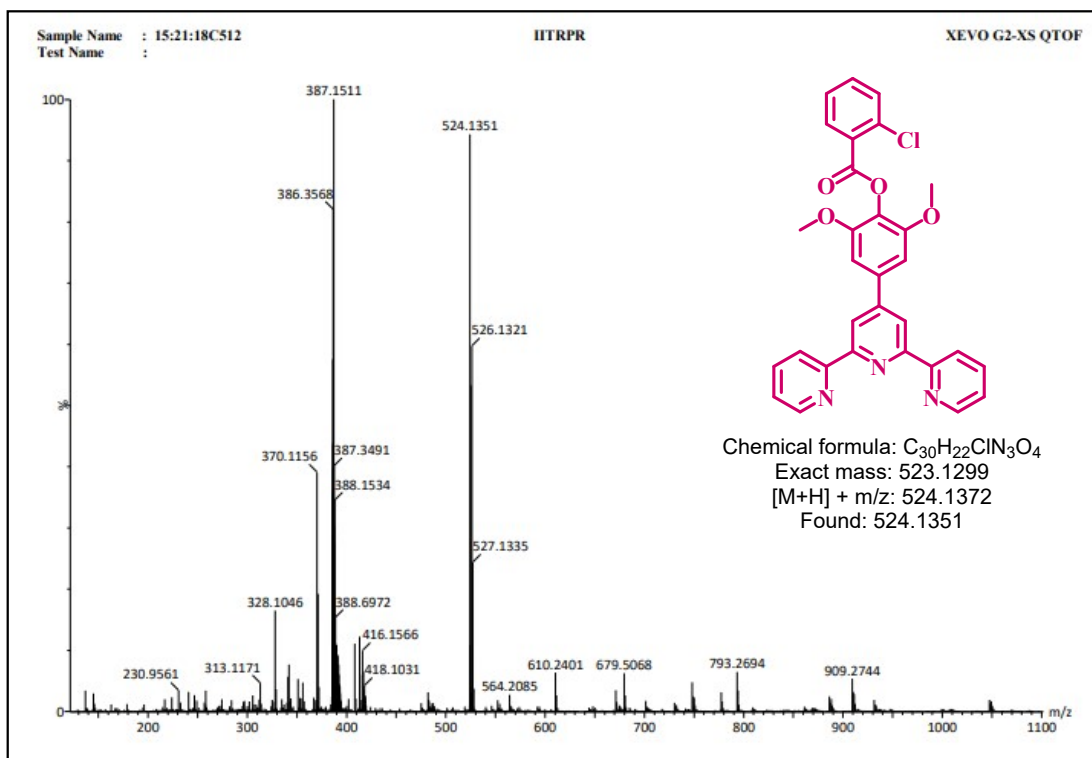

Figure S8. ESI-Mass Spectrum of compound L2

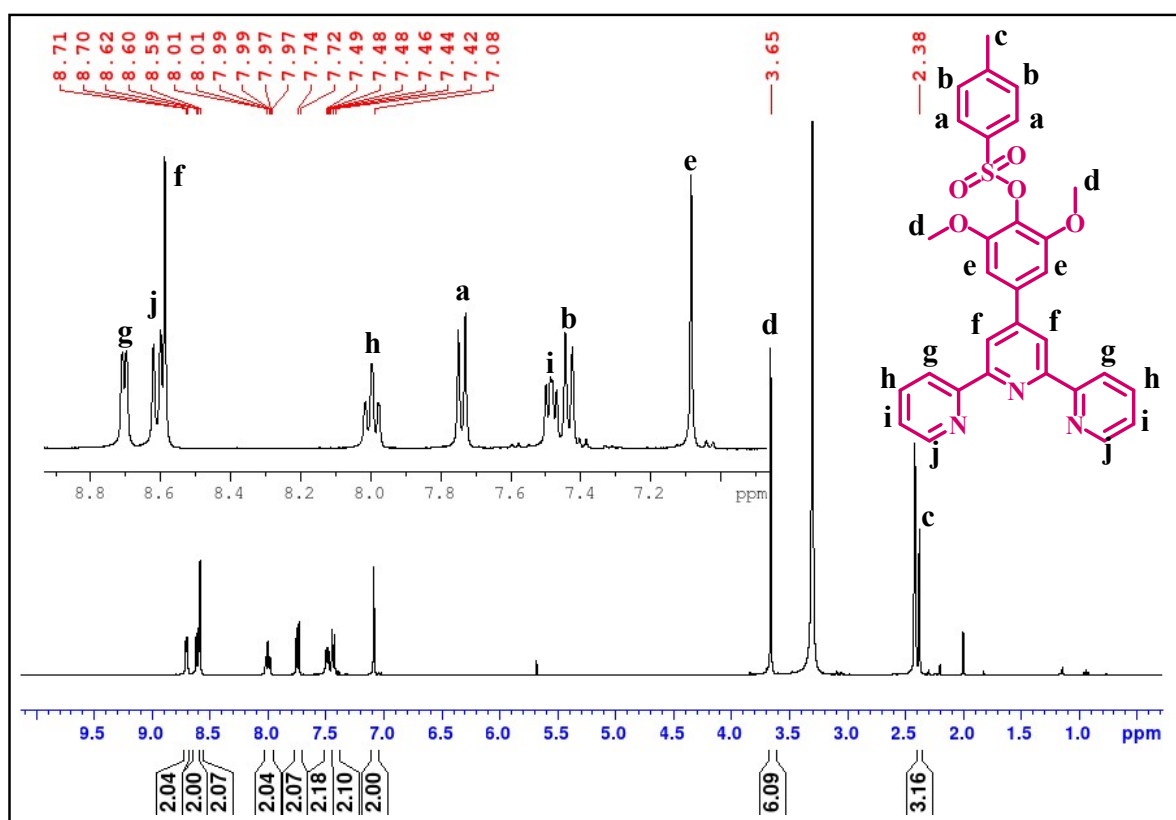

Figure S9.  $^1H$  NMR Spectrum of compound L3

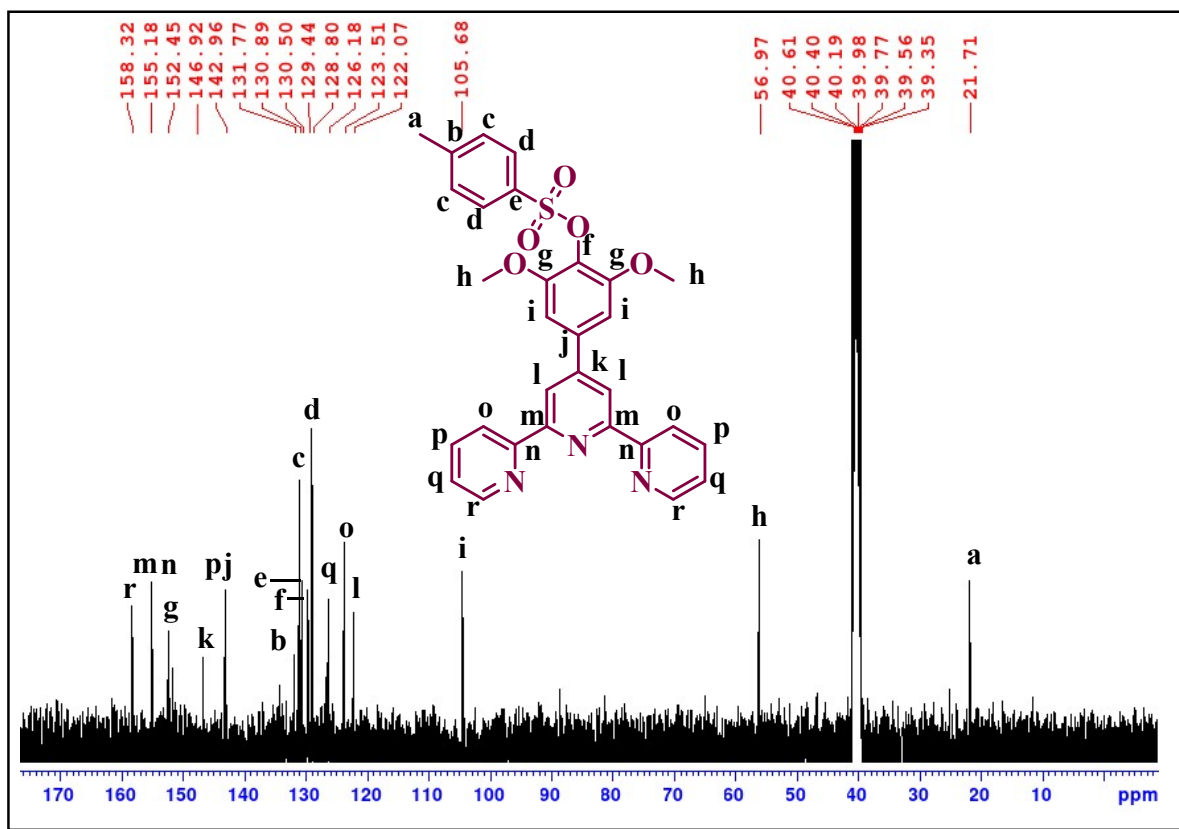

Figure S10. <sup>13</sup>C NMR Spectrum of compound L3

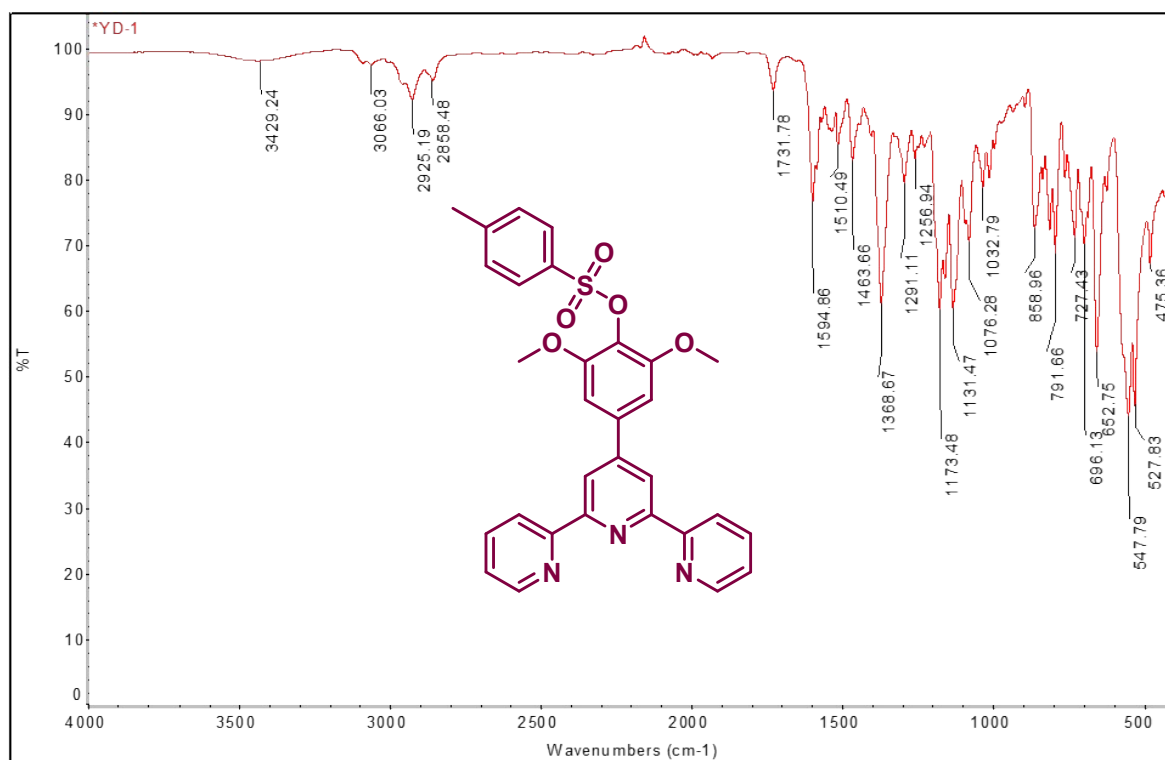

Figure S11. IR Spectrum of compound L3

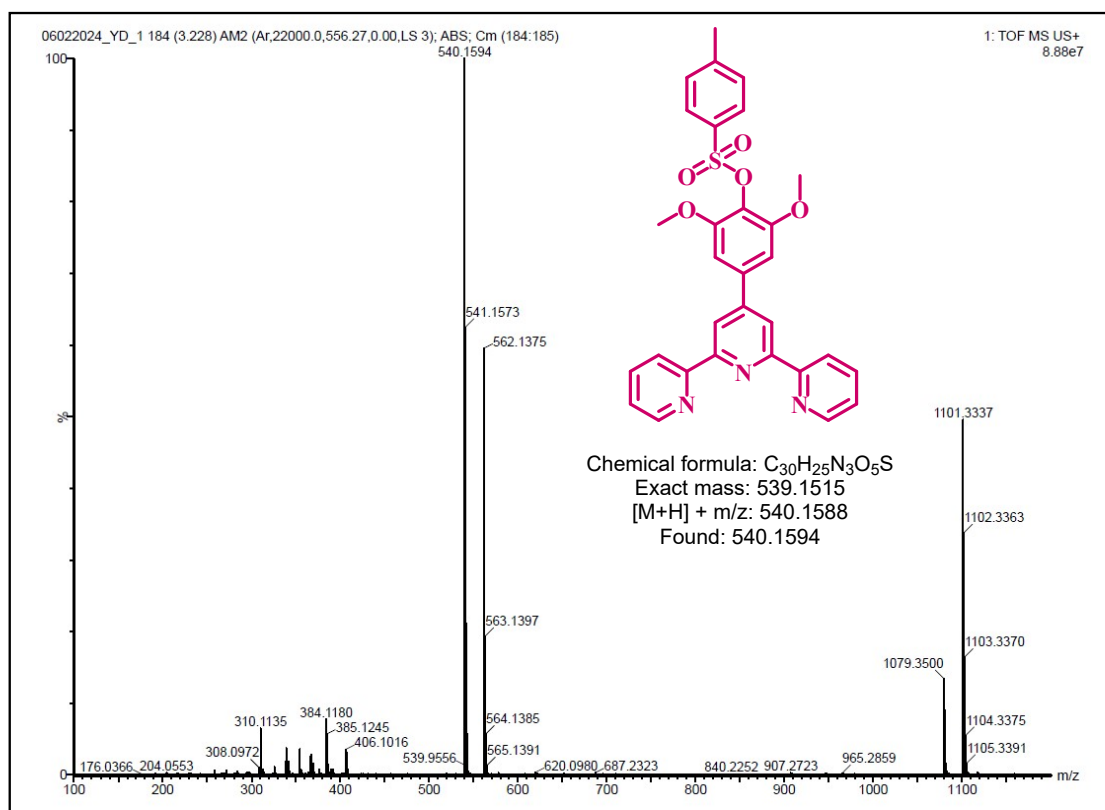

**Figure S12.** ESI-Mass Spectrum of compound L3

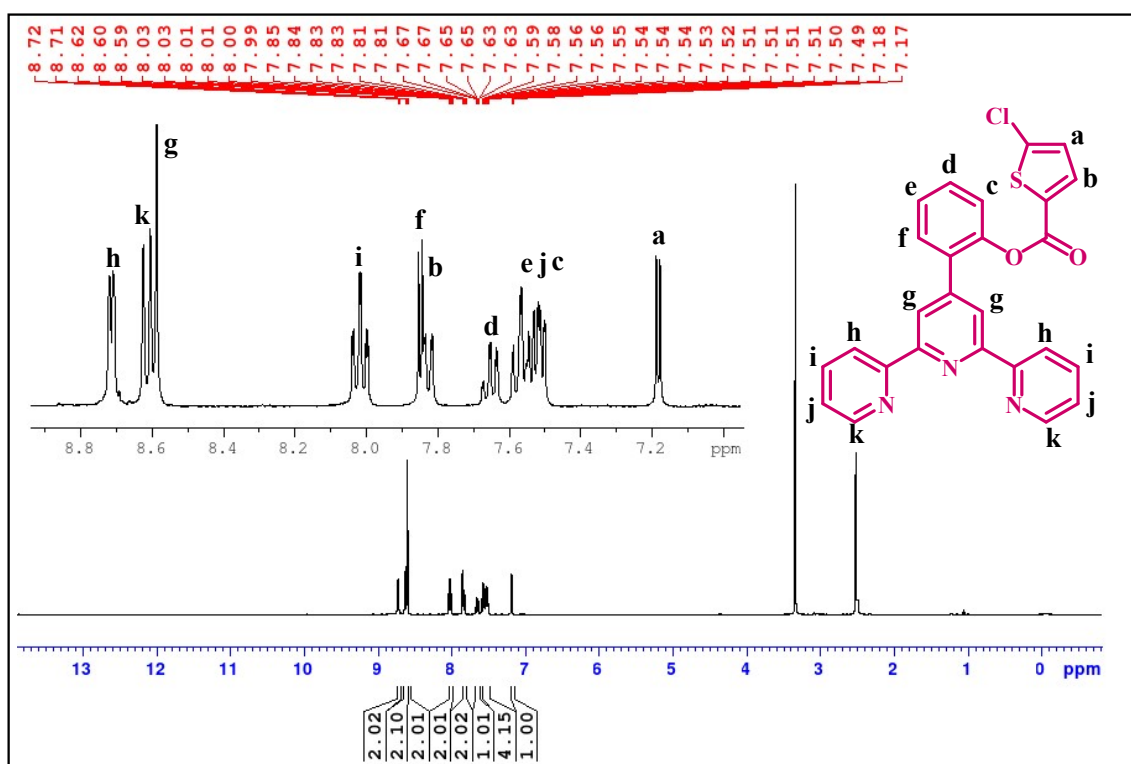

**Figure S13.** <sup>1</sup>H NMR Spectrum of compound L4



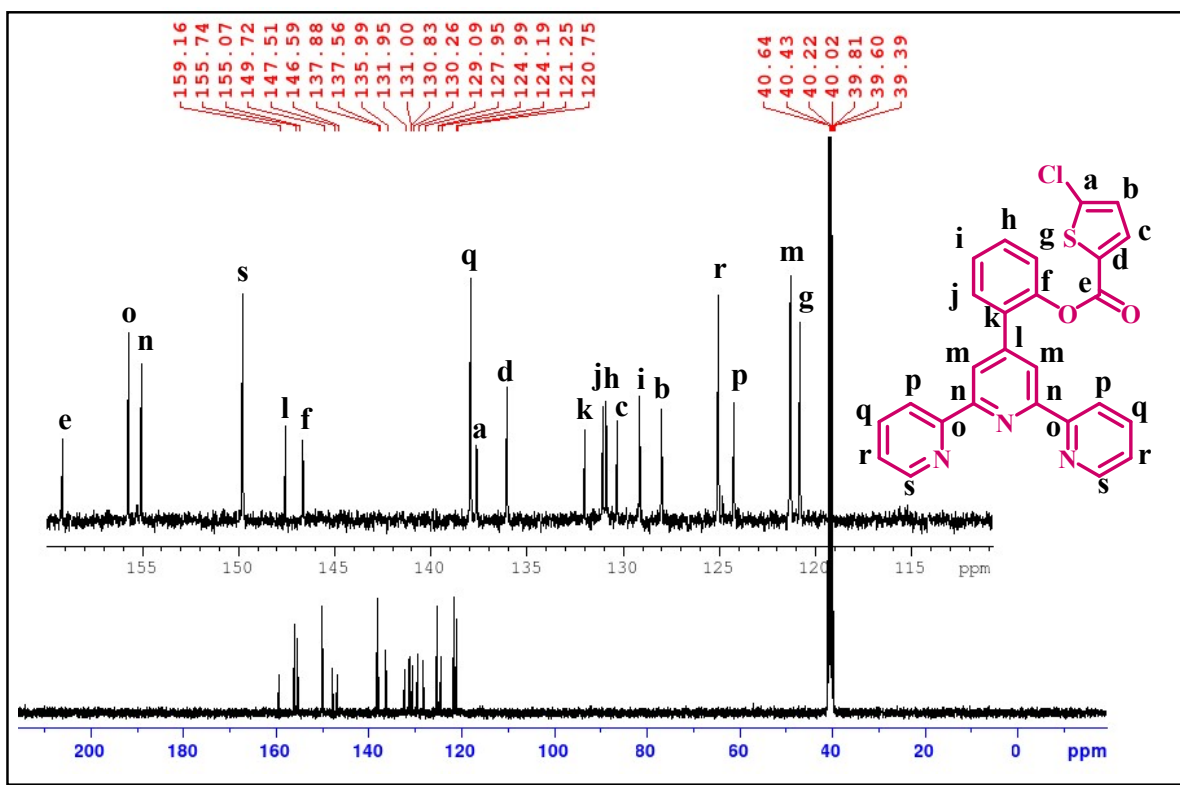

Figure S14.  $^{13}\text{C}$  NMR Spectrum of compound L4

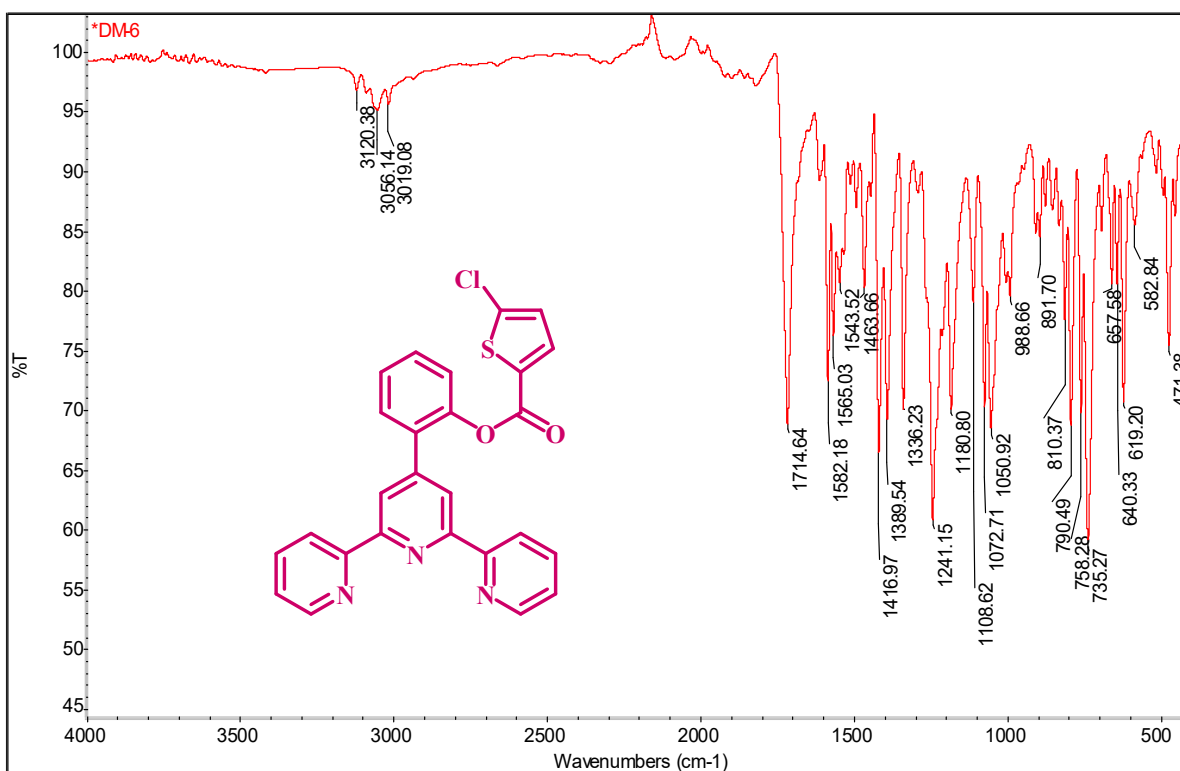

Figure S15. IR Spectrum of compound L4

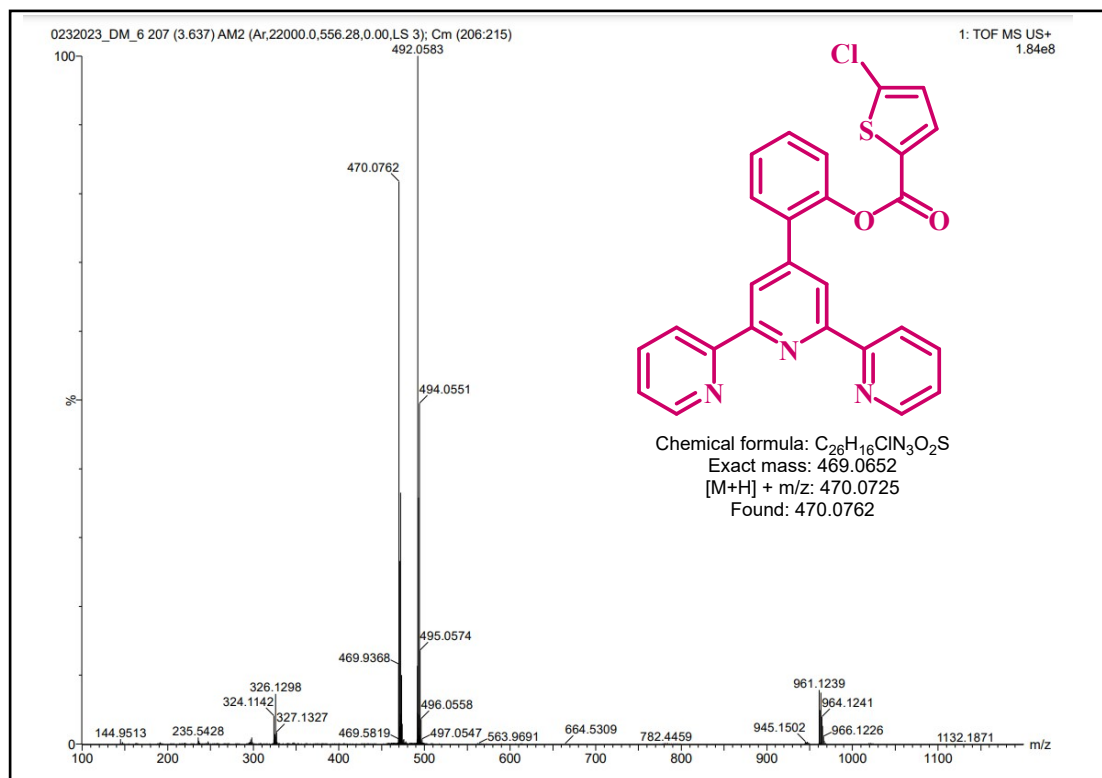

**Figure S16.** ESI-Mass Spectrum of compound L4

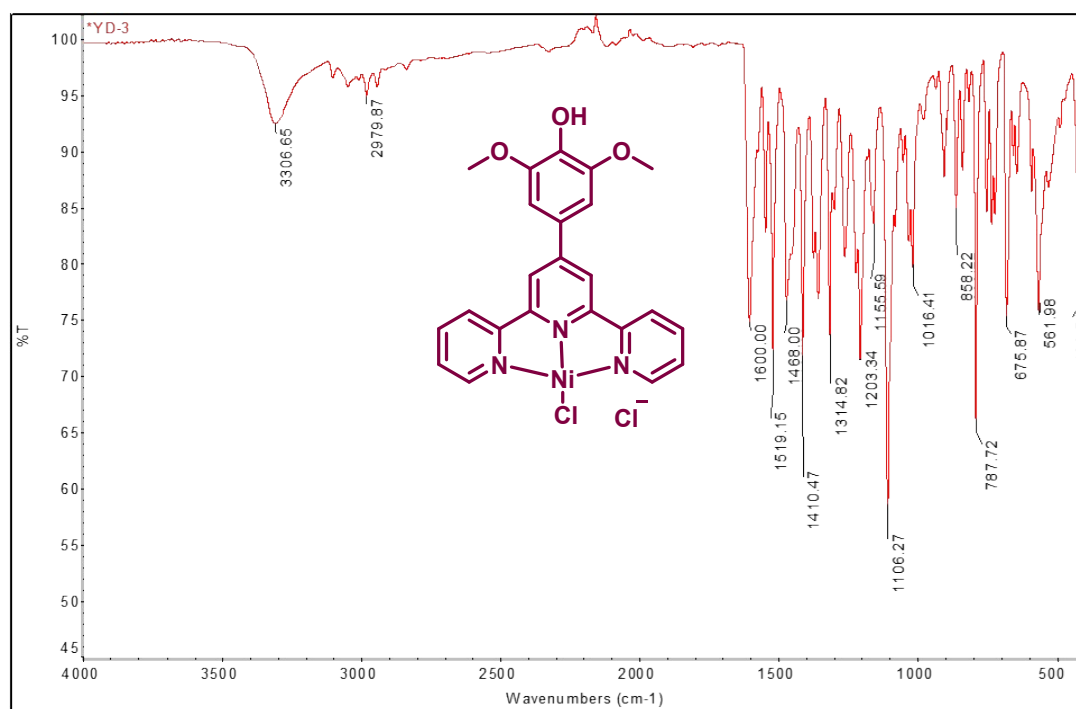

**Figure S17.** IR Spectrum of compound NiL1

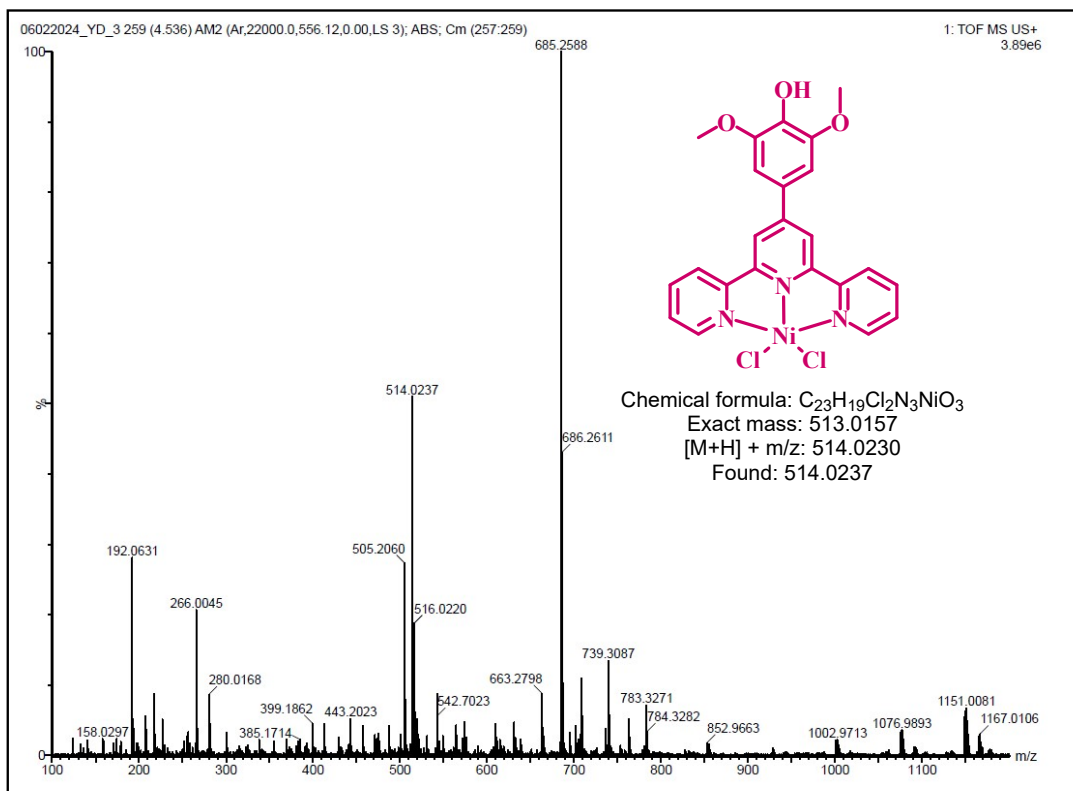

**Figure S18.** ESI-Mass Spectrum of compound NiL1

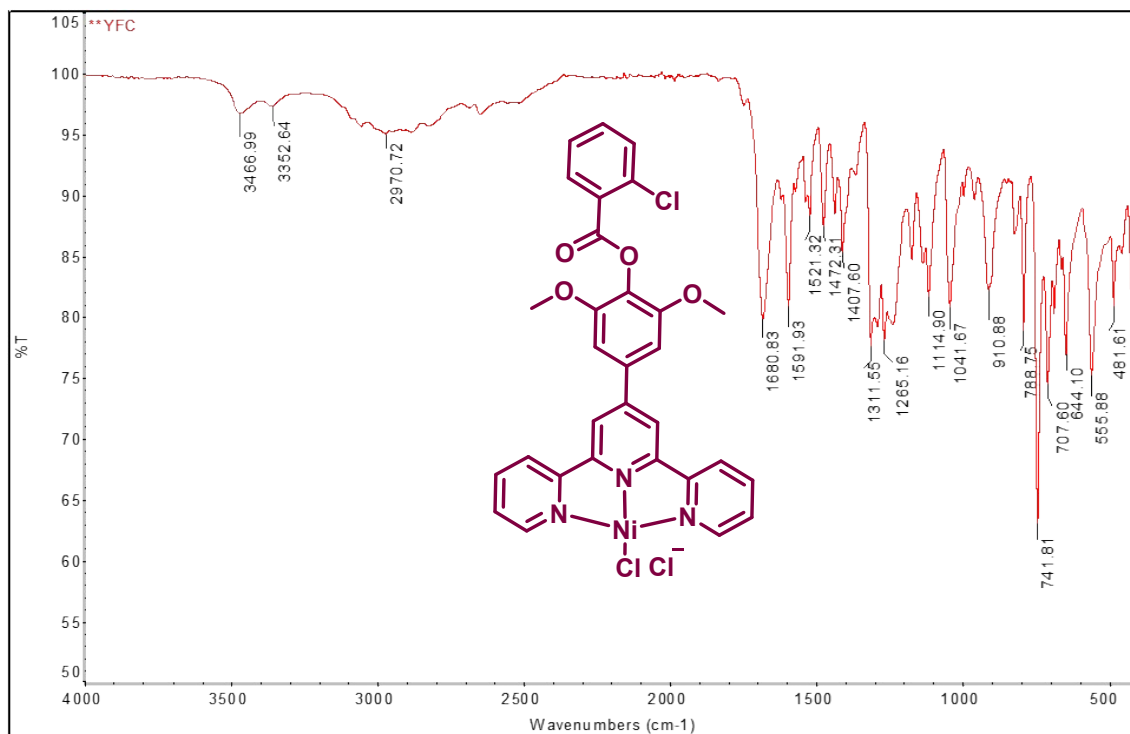

**Figure S19.** IR Spectrum of compound NiL2

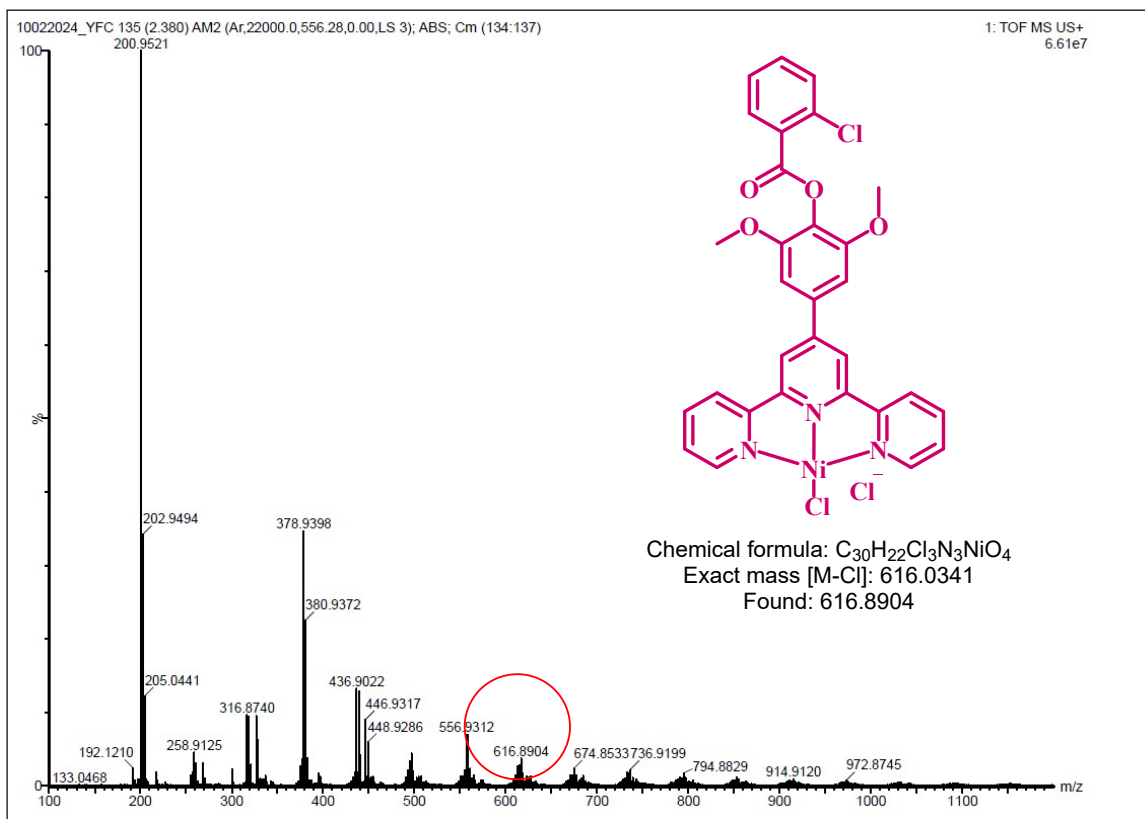

**Figure S20.** ESI-Mass Spectrum of compound NiL2

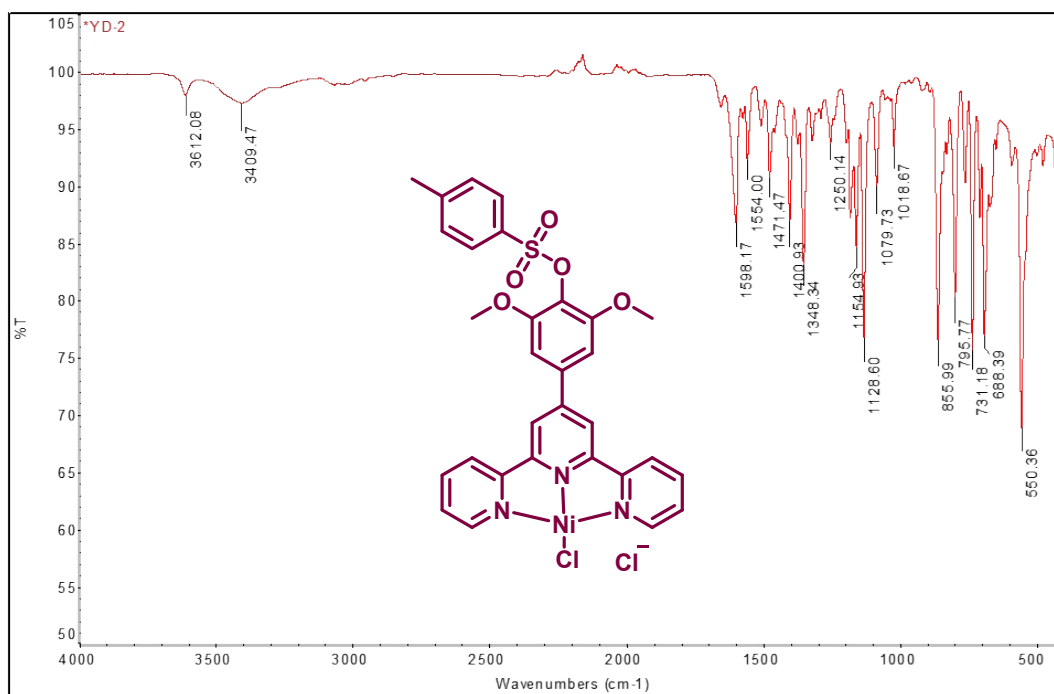

**Figure S21.** IR Spectrum of compound NiL3

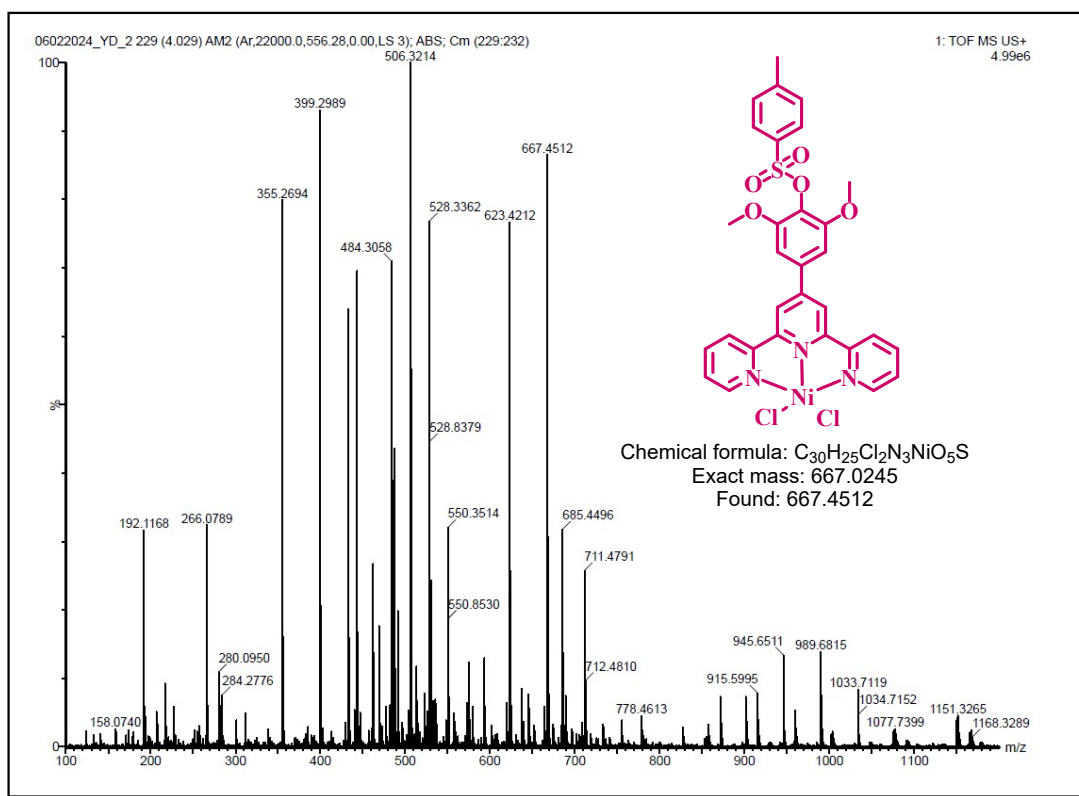

Figure S22. ESI-Mass Spectrum of compound NiL3

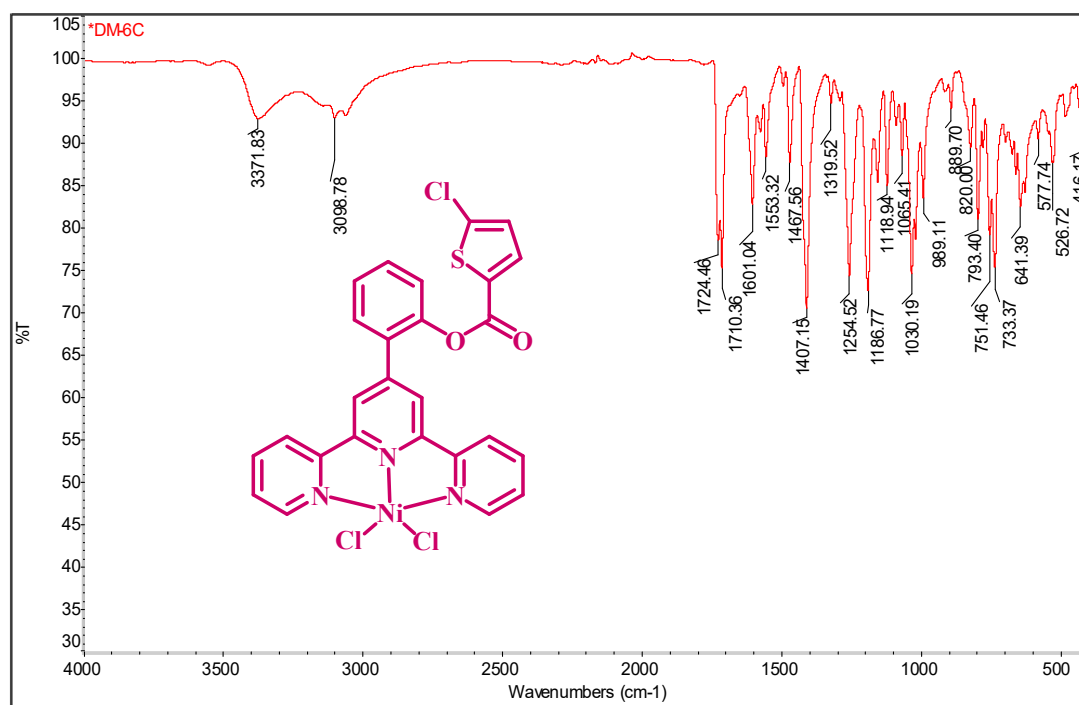

Figure S23. IR Spectrum of compound NiL4

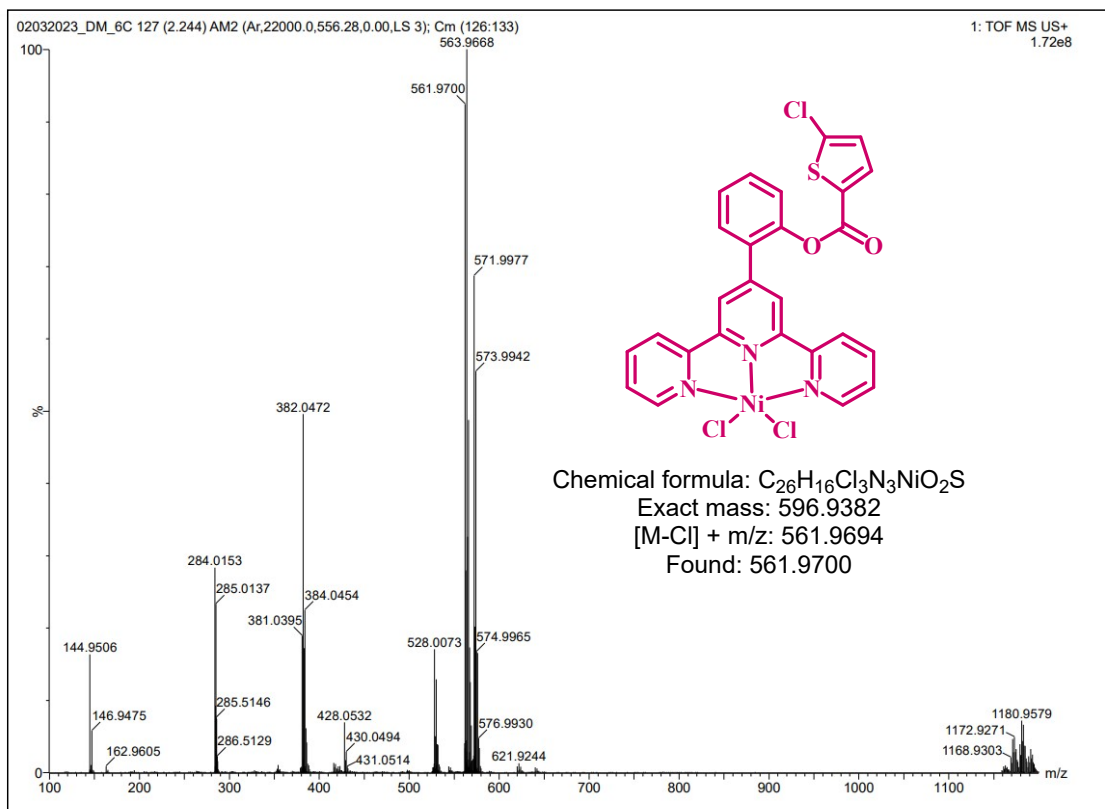

Figure S24. ESI-Mass Spectrum of compound NiL4

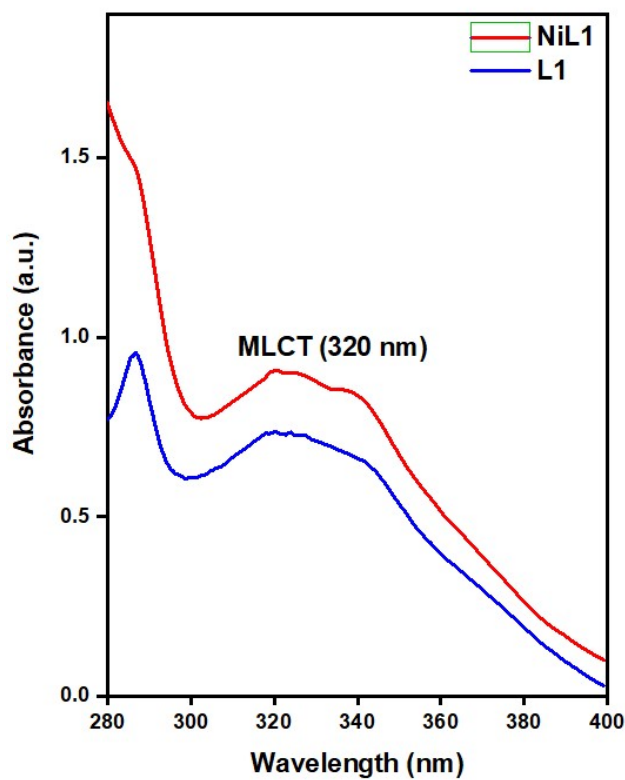

Figure S25. UV-Visible Spectra of compound L1 and NiL1

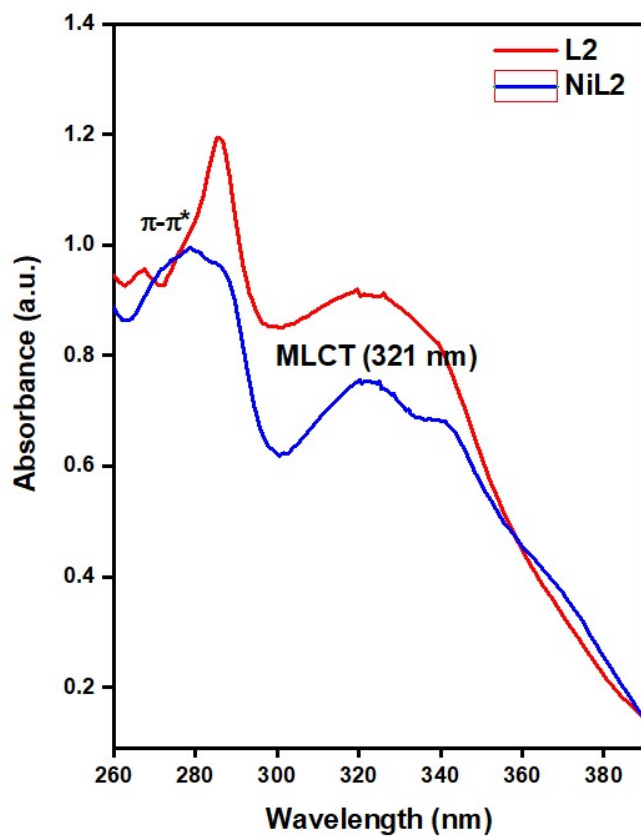

Figure S26. UV-Visible Spectra of compound L2 and NiL2

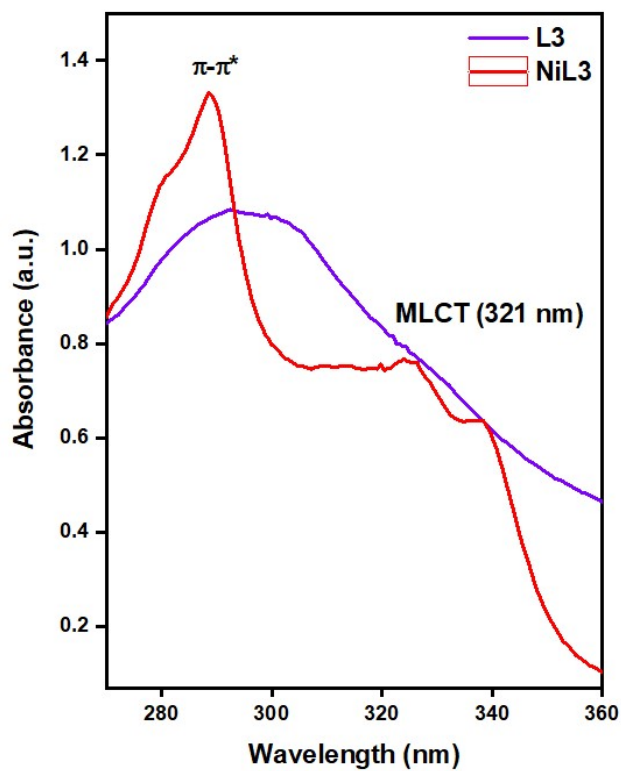

Figure S27. UV-Visible Spectra of compound L3 and NiL3

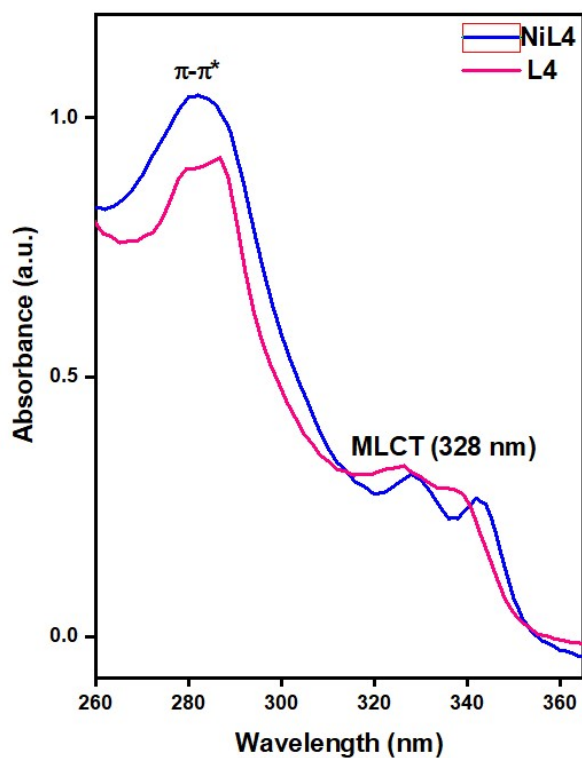

**Figure S28.** UV-Visible Spectra of compound L4 and NiL4

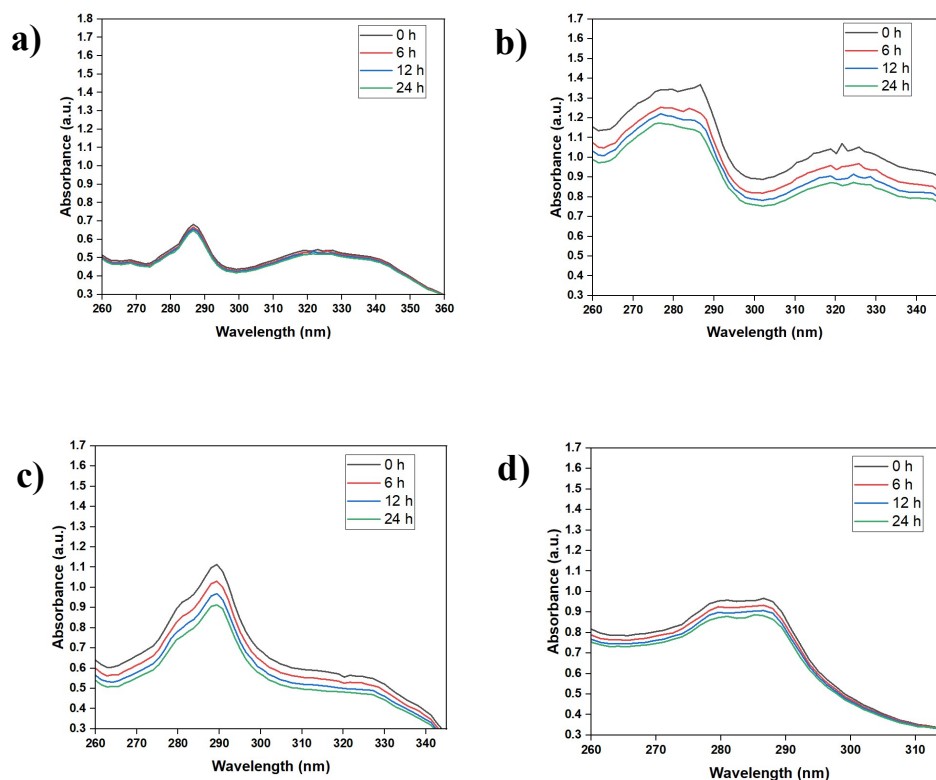

**Figure S29.** Stability studies of L1-L4 (In order a-d) using UV-Visible absorption spectral data ( $1 \times 10^{-5}$  M) in 0.1 mM glutathione (GSH)



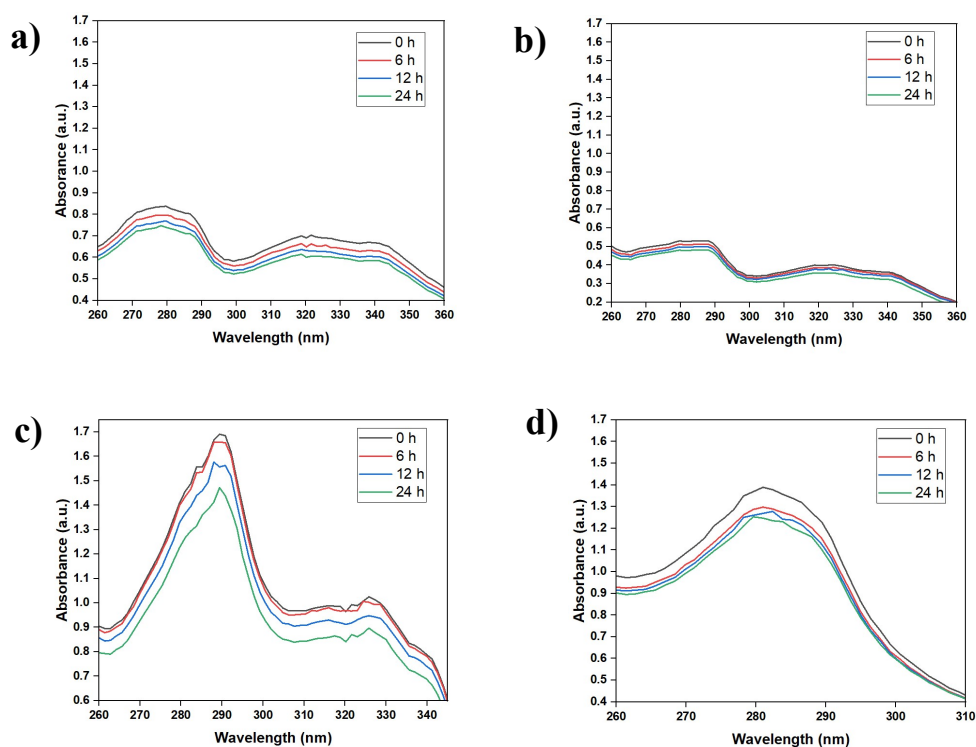

**Figure S30.** Stability studies of NiL1-NiL4 (In order a-d) using UV-Visible absorption spectral data ( $1 \times 10^{-5}$  M) in 0.1 mM glutathione (GSH)

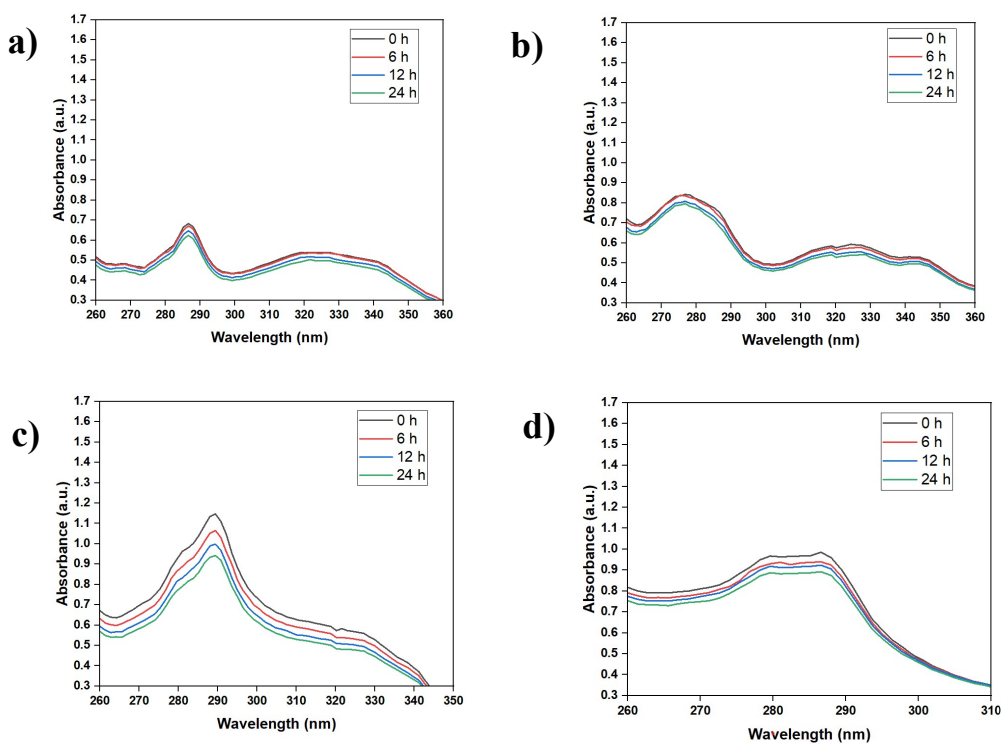

**Figure S31.** Stability studies of L1-L4 (In order a-d) using UV-Visible absorption spectral data ( $1 \times 10^{-5}$  M) under MTT conditions (*i.e.* 5% DMSO in phosphate buffer)

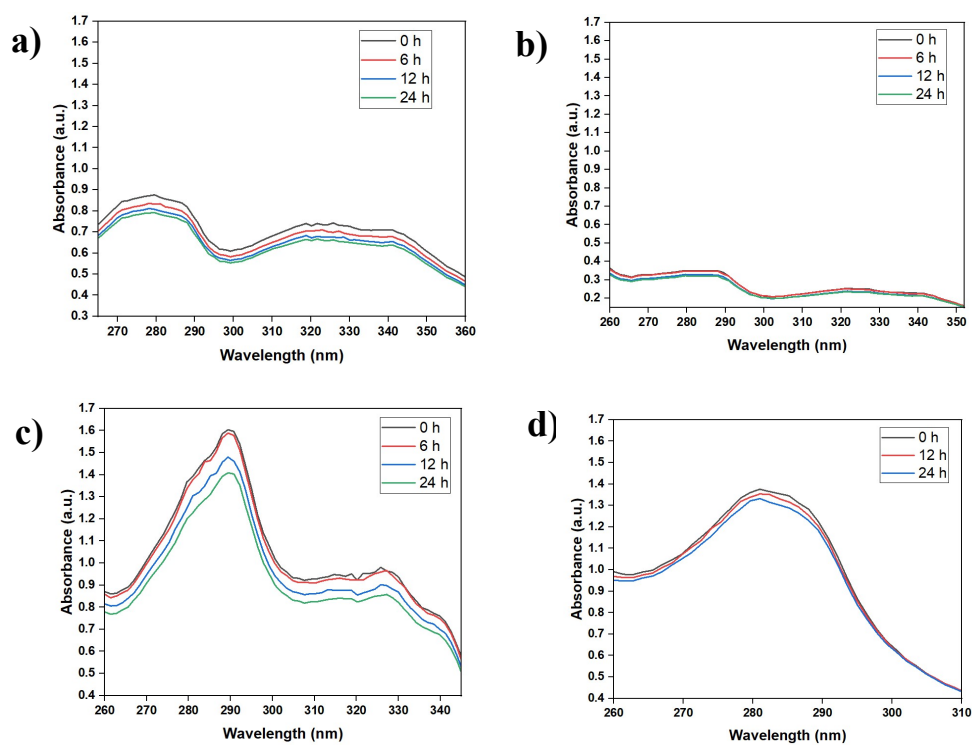

**Figure S32.** Stability studies of NiL1-NiL4 (In order a-d) using UV-Visible absorption spectral data ( $1 \times 10^{-5}$  M) under MTT conditions (*i.e.* 5% DMSO in phosphate buffer)

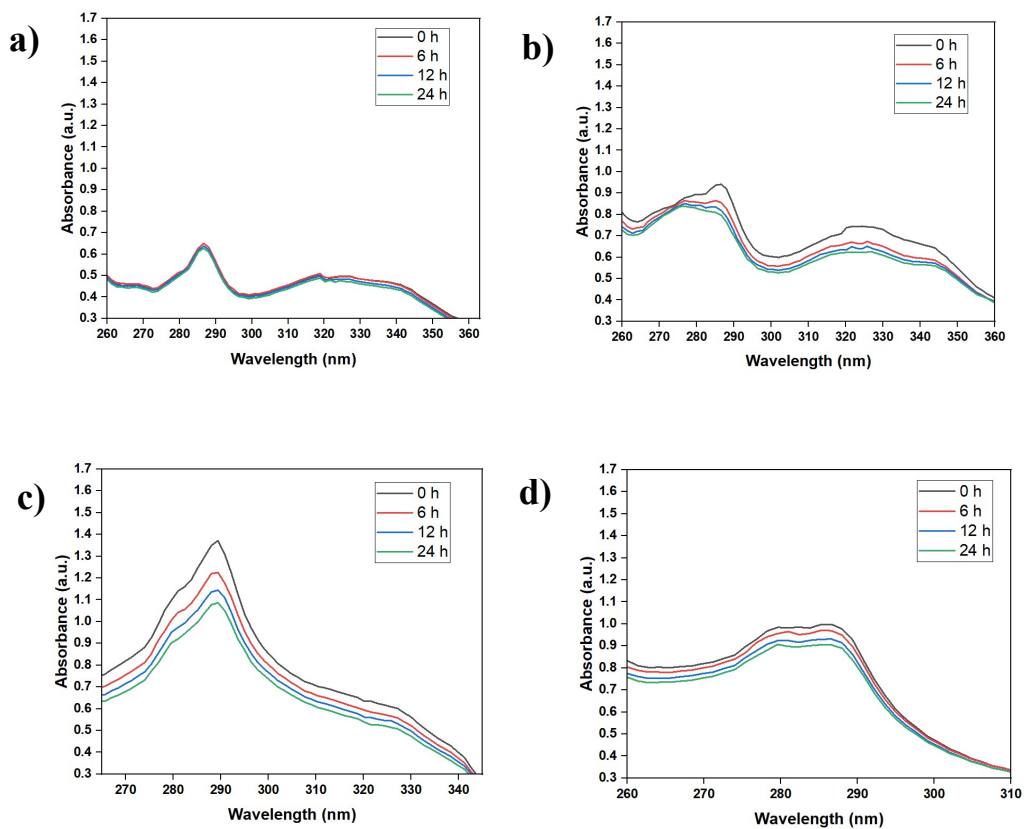

**Figure S33.** Stability studies of **L1-L4** (In order a-d) using UV–Visible absorption spectral data ( $1 \times 10^{-5}$  M) in water

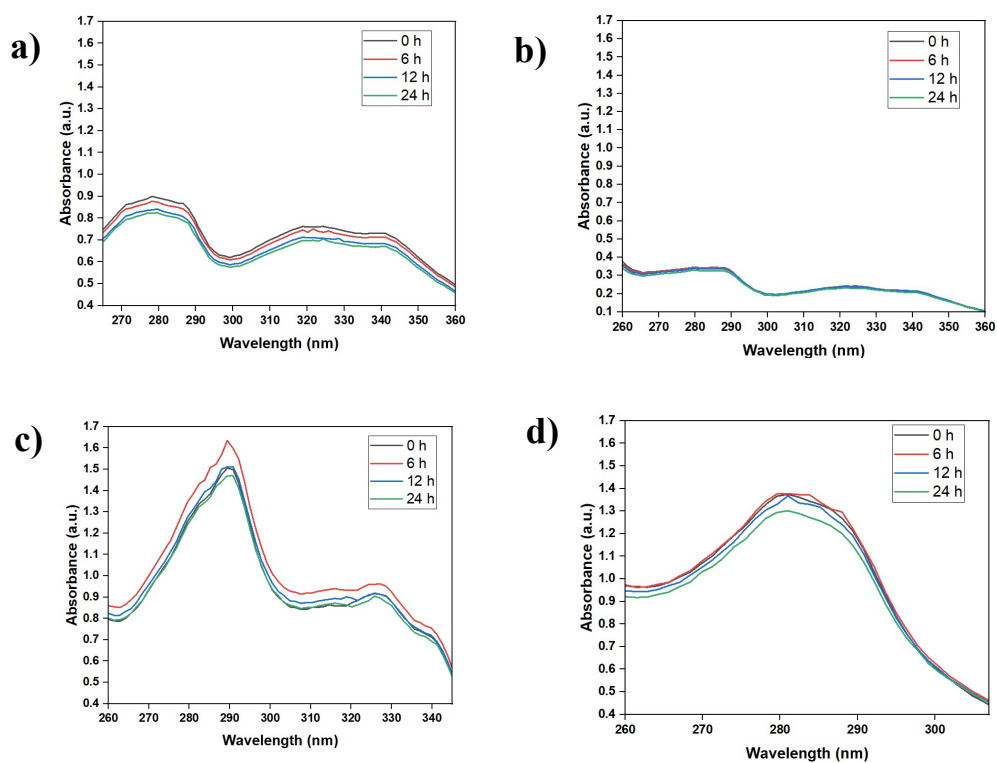

**Figure S34.** Stability studies of **NiL1-NiL4** (In order a-d) using UV–Visible absorption spectral data ( $1 \times 10^{-5}$  M) in water

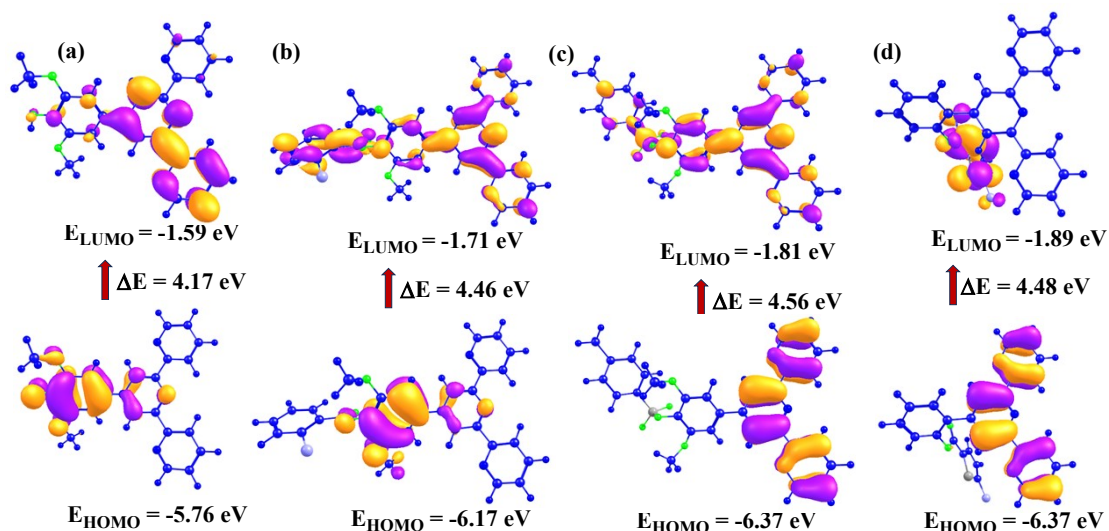

**Figure S35.** Frontier molecular orbitals of the complexes **L1** (a), **L2** (b), **L3** (c) and **L4** (d)

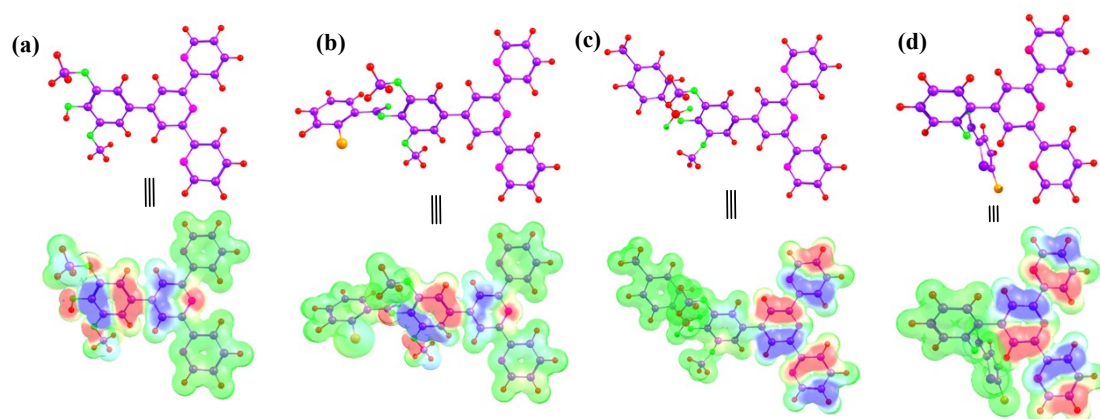

**Figure S36** The ESP mapped on the surface of the ligand **L1** (a), **L2** (b), **L3** (c) and **L4** (d) by the DFT-B3LYP method

**Table S1** Binding energy values of the synthesized ligands and complexes with BSA, 1m17-3 and DNA (AT Rich, GC Rich and Mixed)

| . No | Compound    | BSA   | 1m17-3 | DNA     |         |       |
|------|-------------|-------|--------|---------|---------|-------|
|      |             |       |        | AT Rich | GC Rich | Mixed |
| 1    | <b>L1</b>   | -10.1 | -9.3   | -7.6    | -7.1    | -8.7  |
| 2    | <b>L2</b>   | -10.3 | -9.7   | -8.0    | -7.8    | -8.6  |
| 3    | <b>L3</b>   | -10.6 | -10.5  | -8.0    | -8.1    | -8.7  |
| 4    | <b>L4</b>   | -9.0  | -10.6  | -7.3    | -7.3    | -6.5  |
| 5    | <b>NiL1</b> | -8.8  | -9.7   | -8.1    | -7.6    | -7.8  |
| 6    | <b>NiL2</b> | -10.3 | -10.5  | -8.2    | -8.3    | -8.7  |
| 7    | <b>NiL3</b> | -10.4 | -9.6   | -8.6    | -8.9    | -9.2  |
| 8    | <b>NiL4</b> | -9.0  | -9.8   | -7.3    | -7.4    | -8.2  |



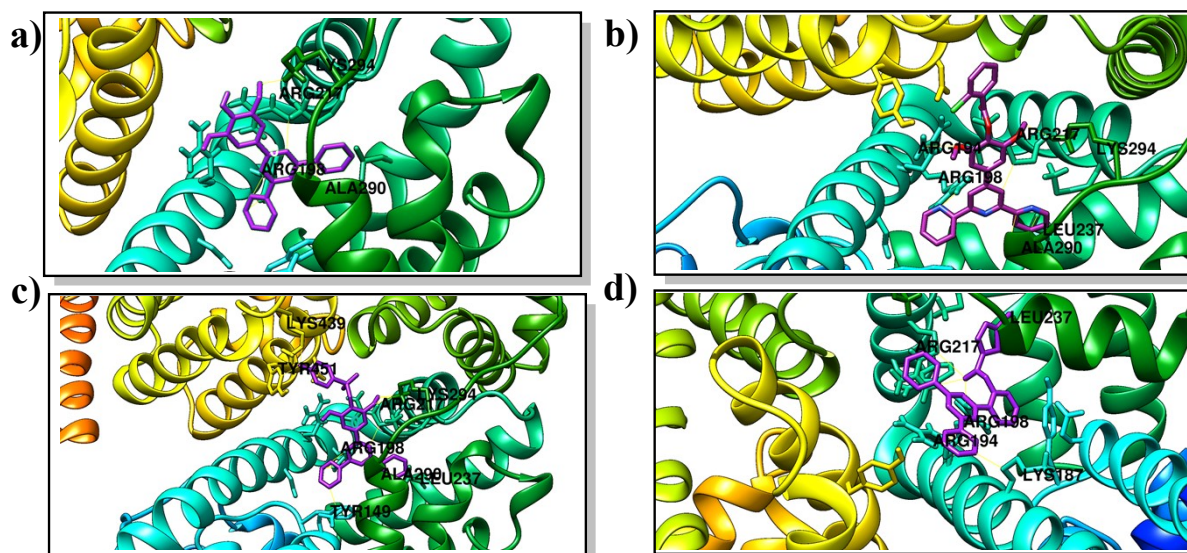

**Figure S37** Molecular docking interactions of ligands with BSA

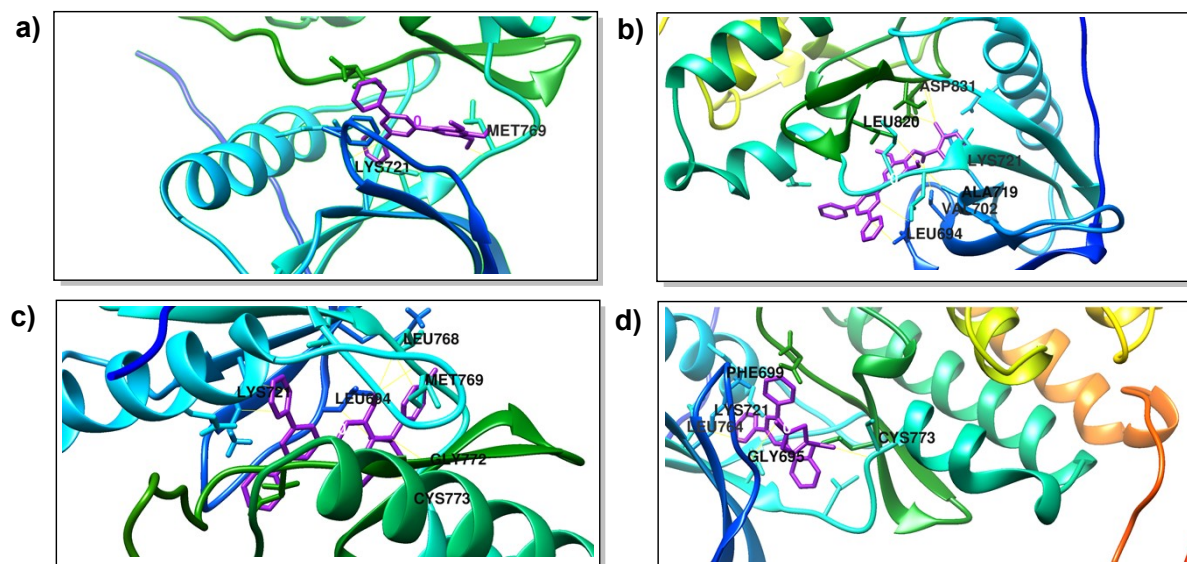

**Figure S38** Molecular docking interactions of ligands with Im-17-3

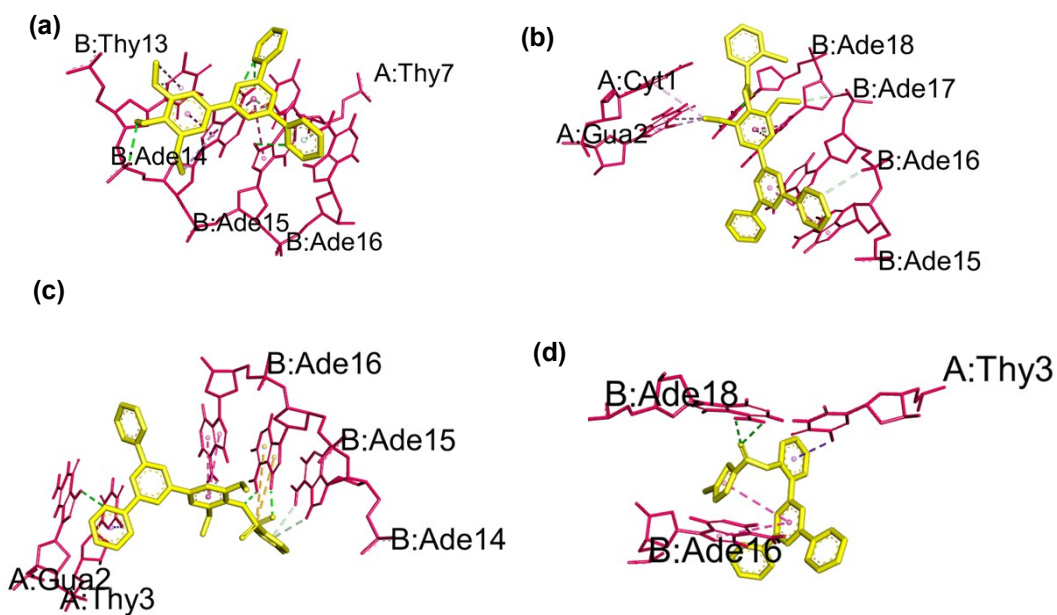

**Figure S39.** Molecular docking interactions of ligands with DNA (AT Rich)

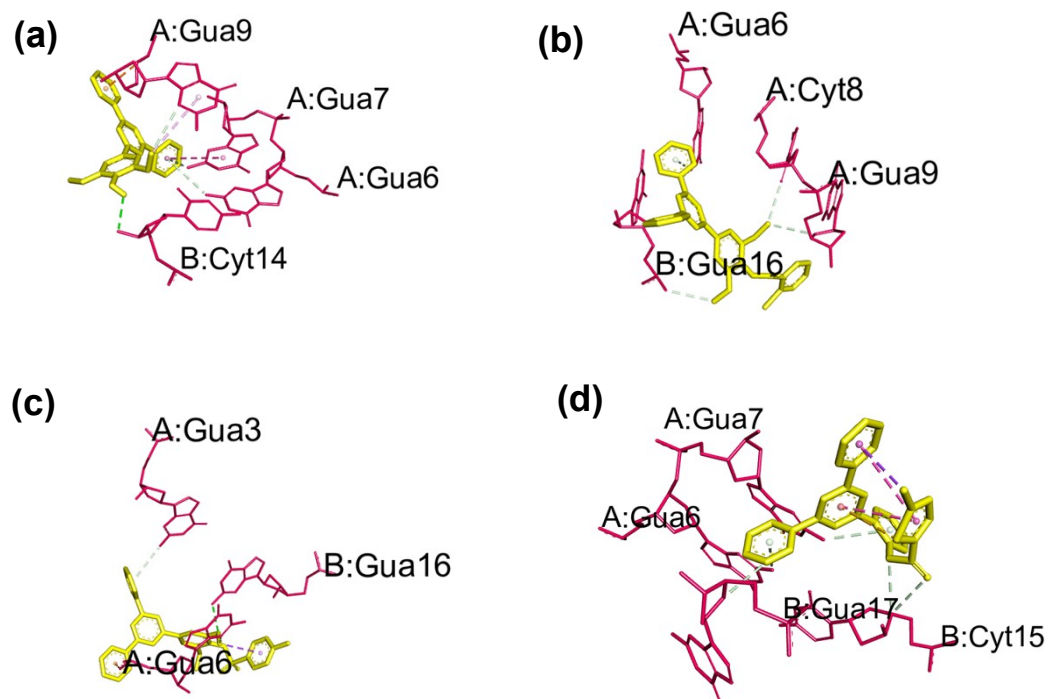

**Figure S40.** Molecular docking interactions of ligands with DNA (GC Rich)

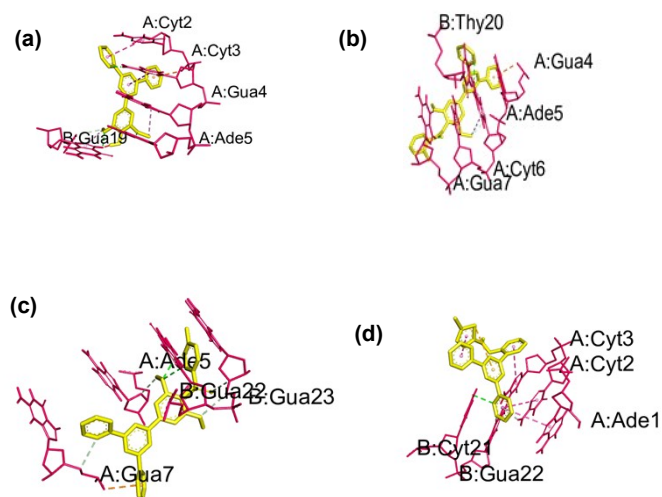

**Figure S41.** Molecular docking interactions of ligands with DNA (Mixed)

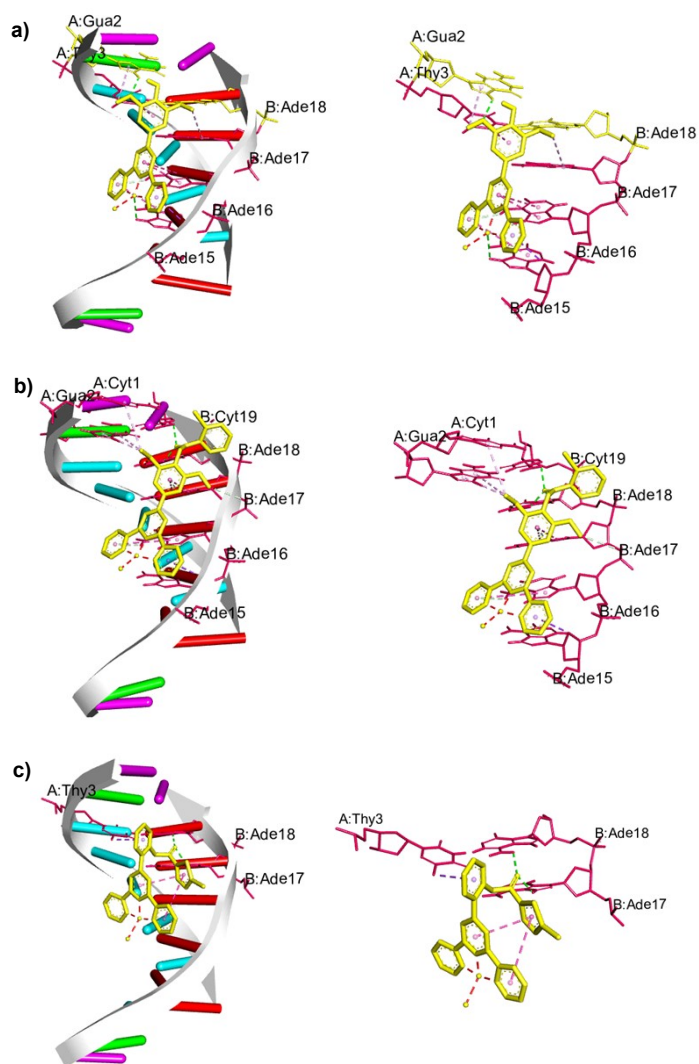

**Figure S42.** Molecular docking interactions of complexes NiL1 (a), NiL2 (b), NiL4 (c) with DNA (AT Rich)

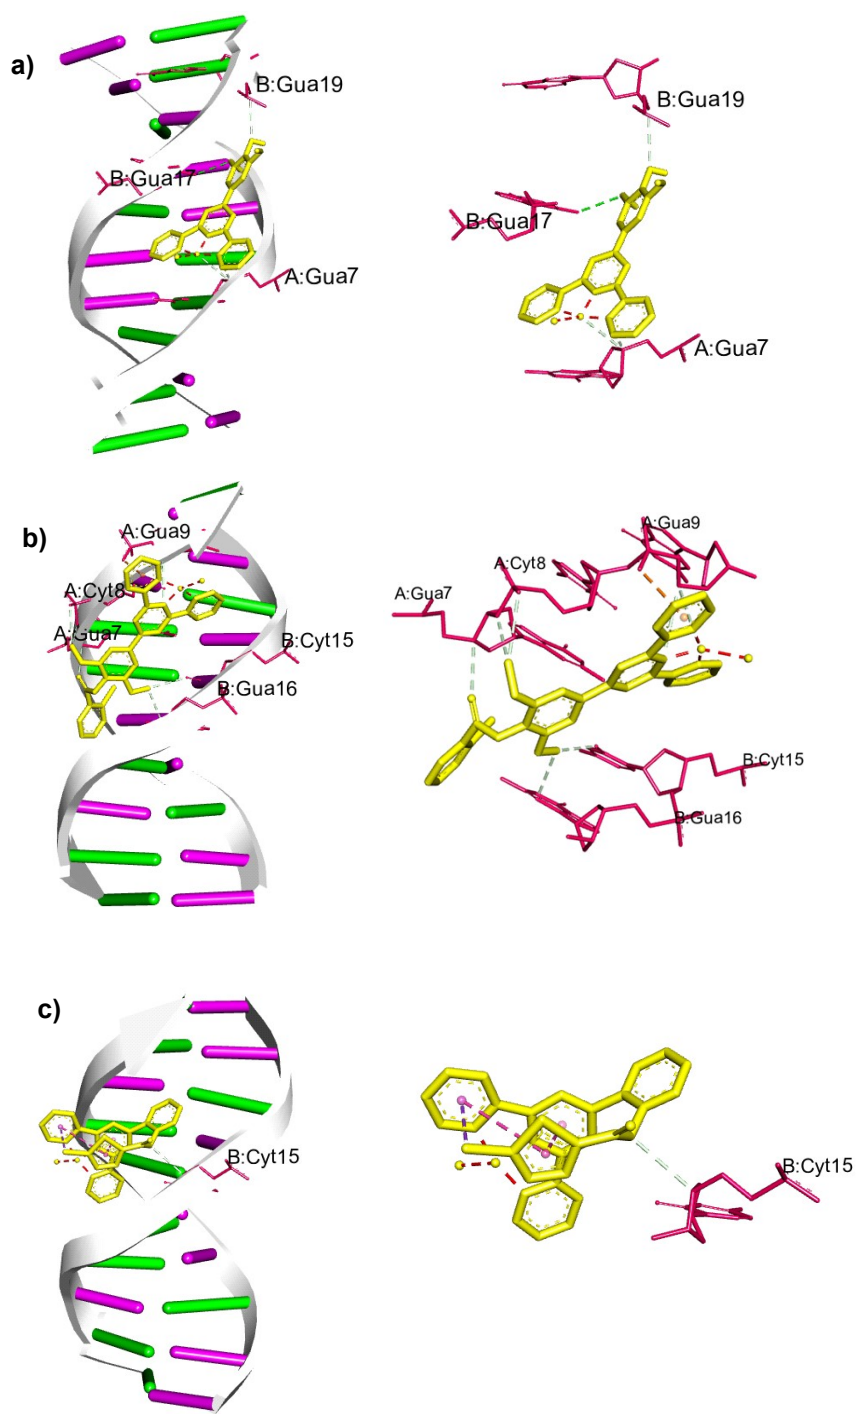

**Figure S43.** Molecular docking interactions of complexes NiL1 (a), NiL2 (b), NiL4 (c) with DNA (GC Rich)



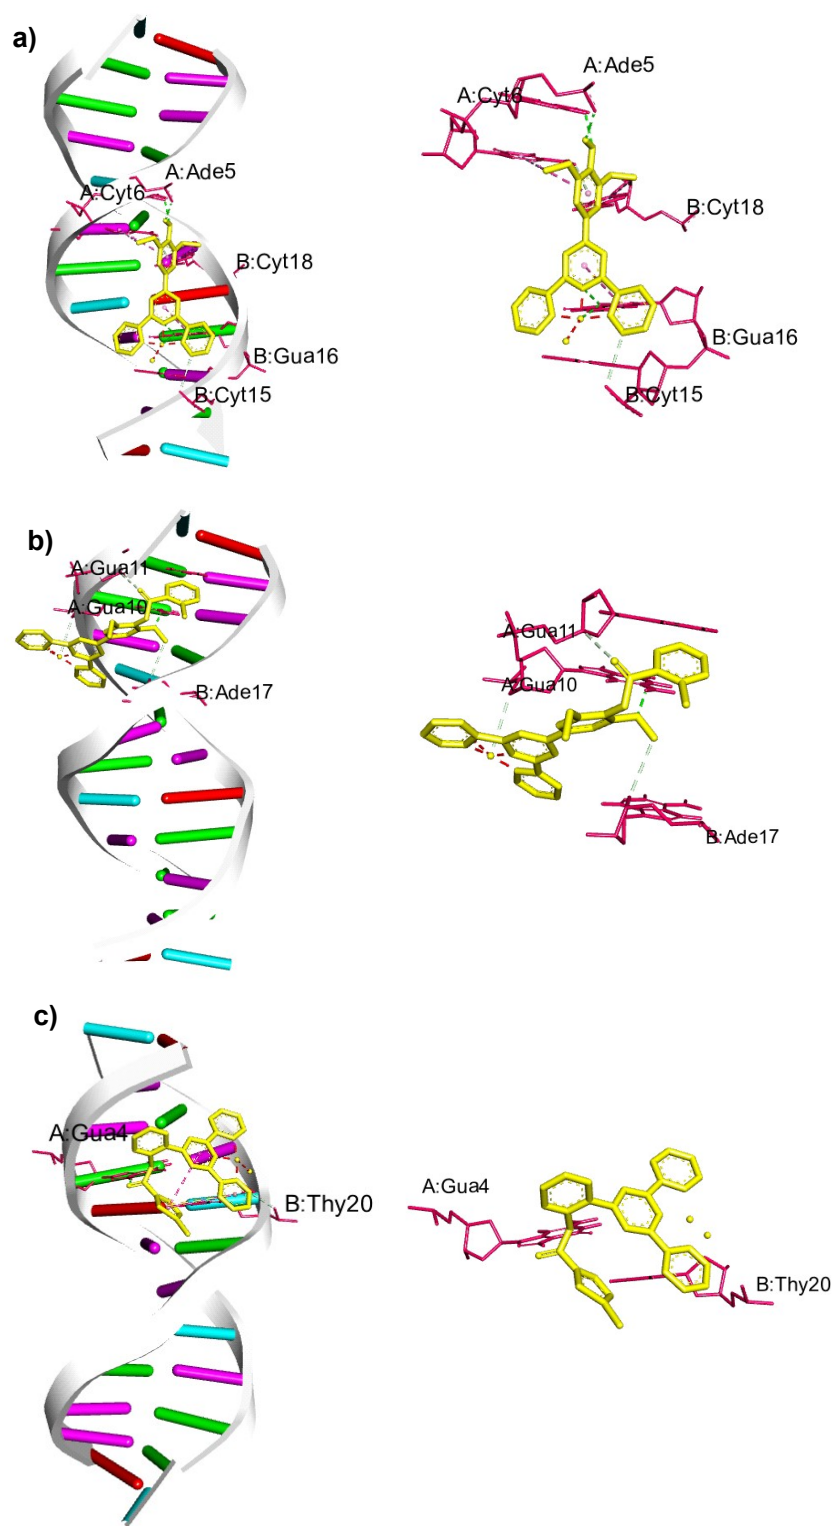

**Figure S44.** Molecular docking interactions of complexes NiL1 (a), NiL2 (b), NiL4 (c) with DNA (Mixed)

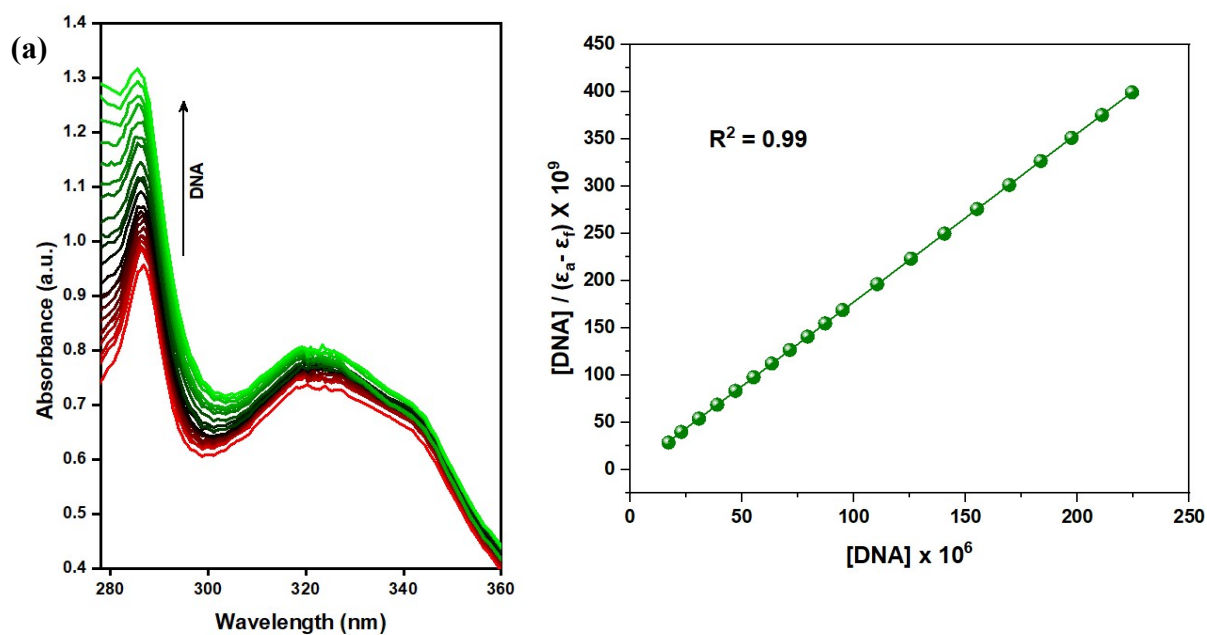

**Figure S45.** UV-Visible absorbance response of **L1** ( $1.0 \times 10^{-5}$ ) at pH 7.2 in 5 mM Tris-HCl-NaCl buffer solution in the presence of incremental addition of CT-DNA

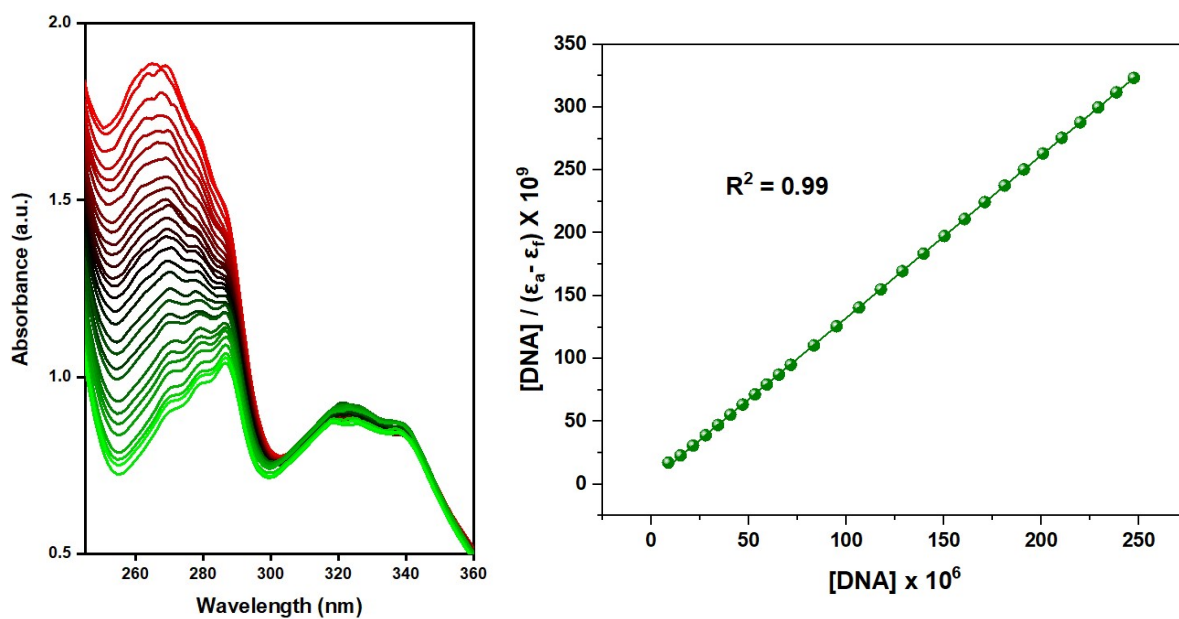

**Figure S46.** UV-Visible absorbance response of **NiL1** ( $1.0 \times 10^{-5}$ ) at pH 7.2 in 5 mM Tris-HCl-NaCl buffer solution in the presence of incremental addition of CT-DNA

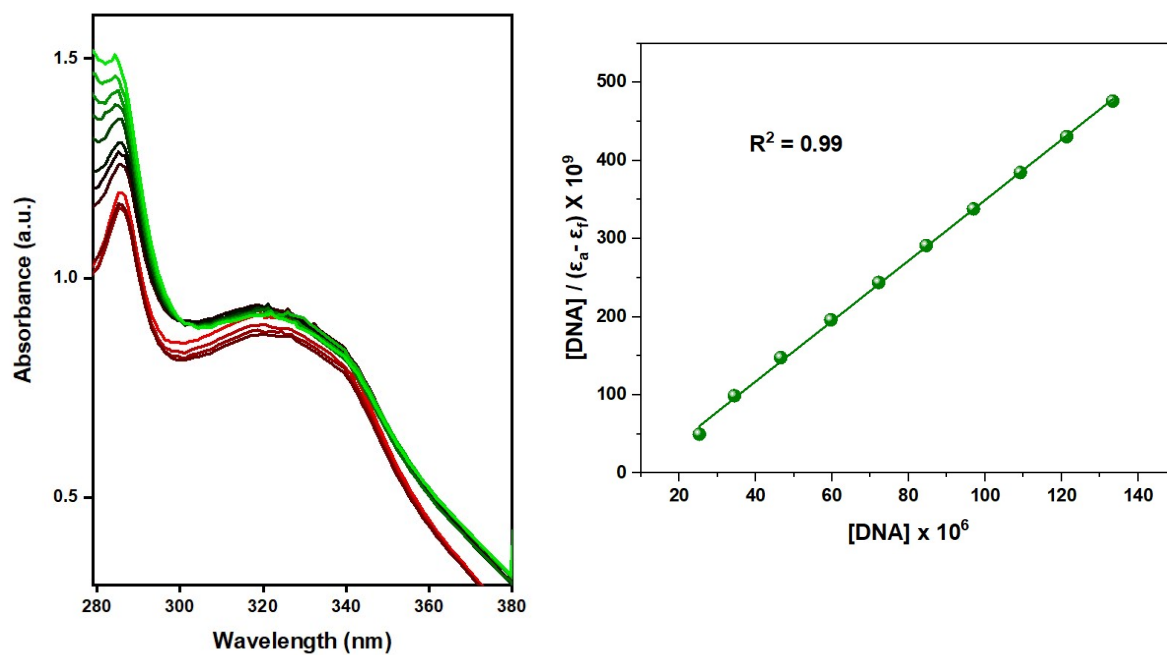

**Figure S47.** UV-Visible absorbance response of **L2** ( $1.0 \times 10^{-5}$ ) at pH 7.2 in 5 mM Tris-HCl-NaCl buffer solution in the presence of incremental addition of CT-DNA

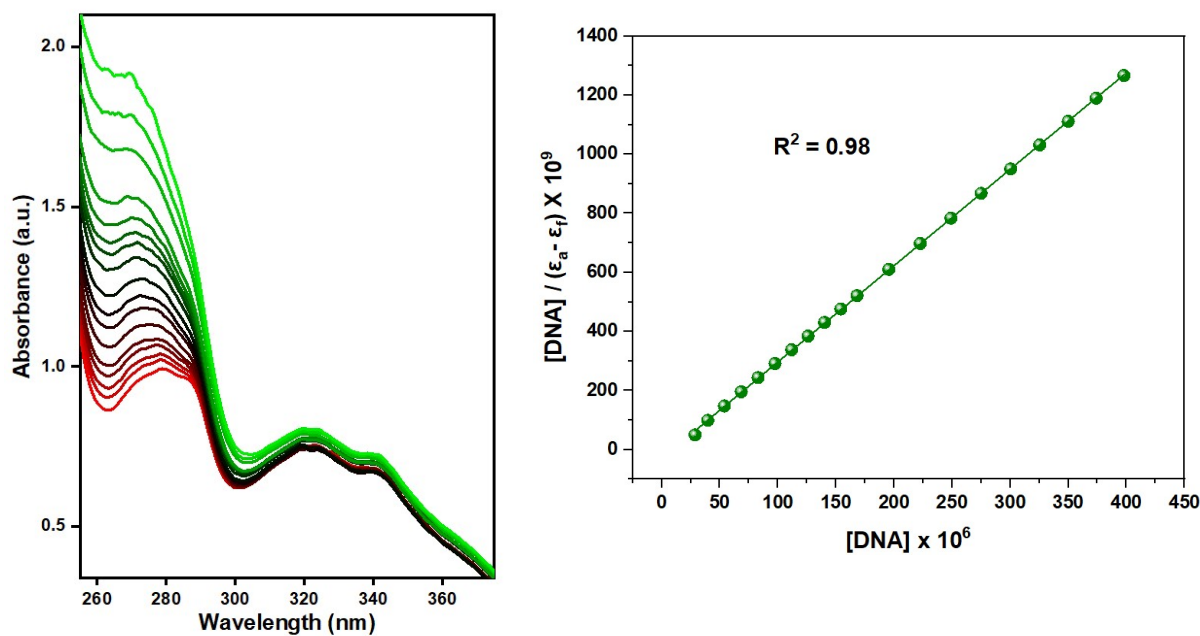

**Figure S48.** UV-Visible absorbance response of **NiL2** ( $1.0 \times 10^{-5}$ ) at pH 7.2 in 5 mM Tris-HCl-NaCl buffer solution in the presence of incremental addition of CT-DNA

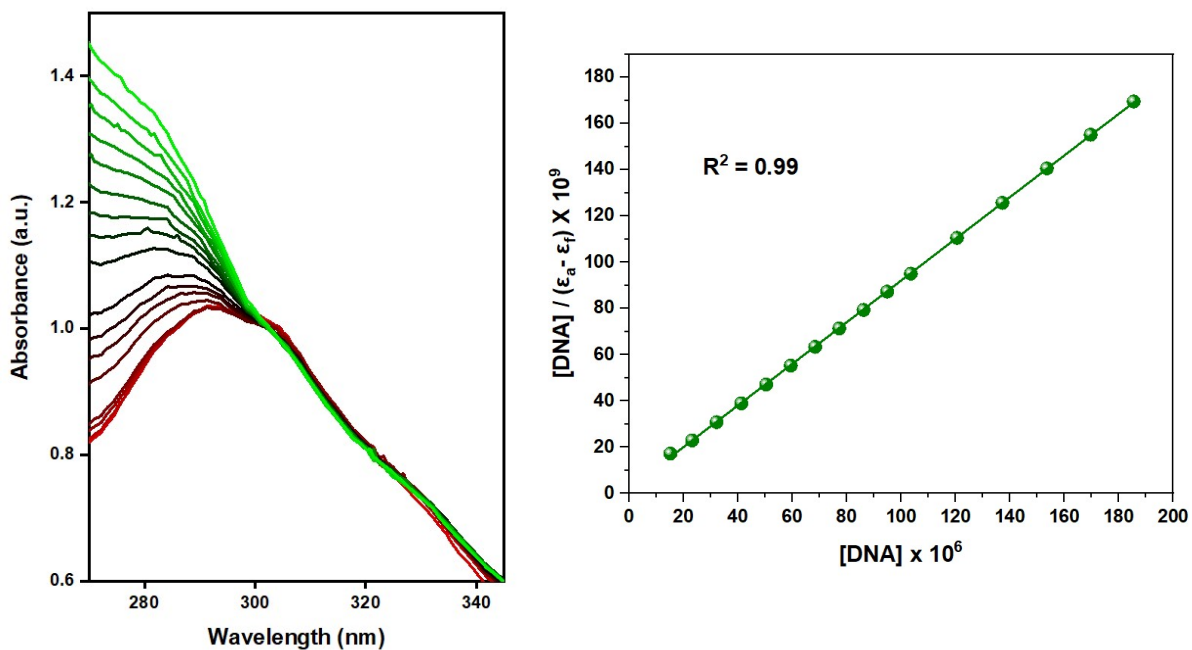

**Figure S49.** UV-Visible absorbance response of **L3** ( $1.0 \times 10^{-5}$ ) at pH 7.2 in 5 mM Tris-HCl-NaCl buffer solution in the presence of incremental addition of CT-DNA

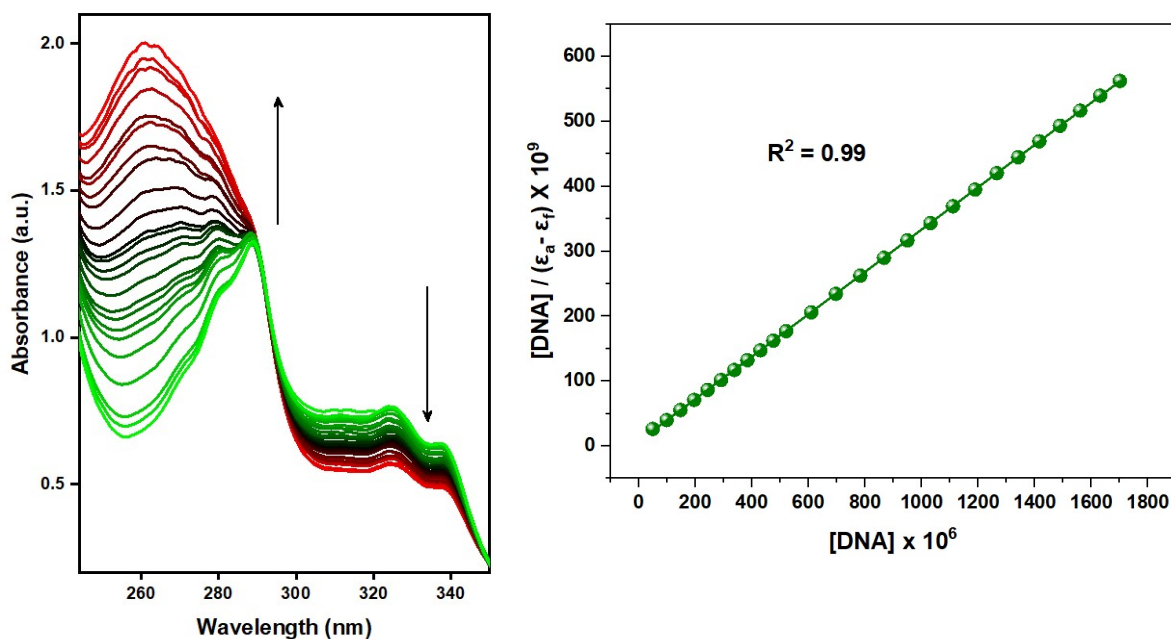

**Figure S50.** UV-Visible absorbance response of **NiL3** ( $1.0 \times 10^{-5}$ ) at pH 7.2 in 5 mM Tris-HCl-NaCl buffer solution in the presence of incremental addition of CT-DNA

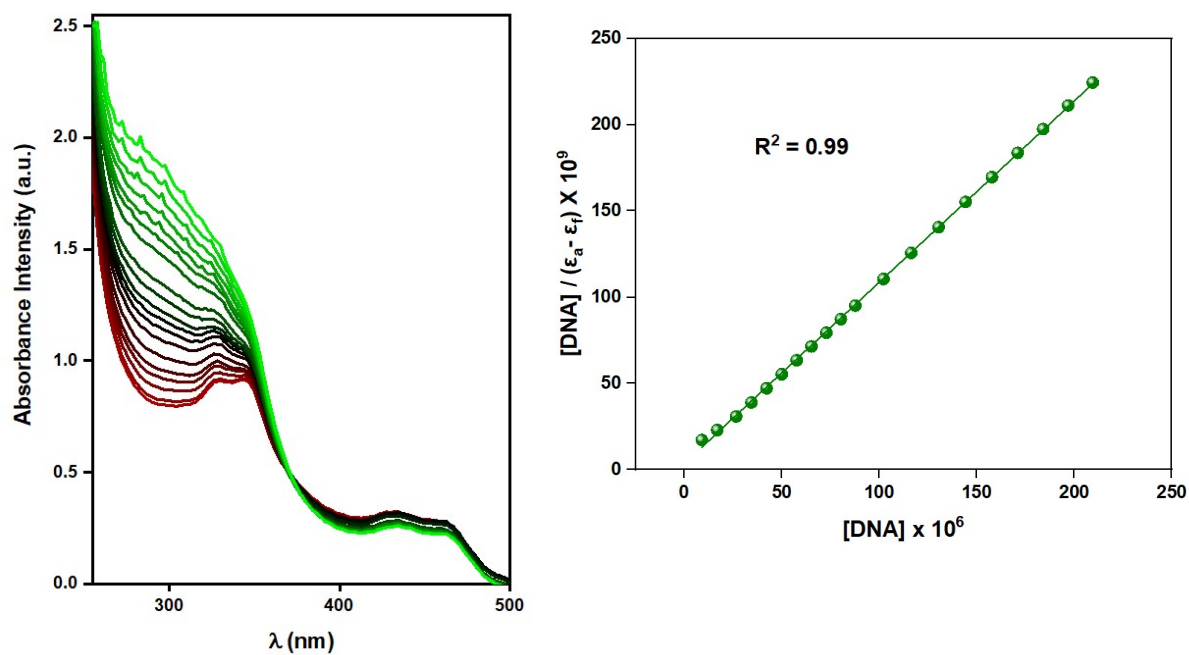

**Figure S51.** UV-Visible absorbance response of L4 ( $1.0 \times 10^{-5}$ ) at pH 7.2 in 5 mM Tris-HCl-NaCl buffer solution in the presence of incremental addition of CT-DNA

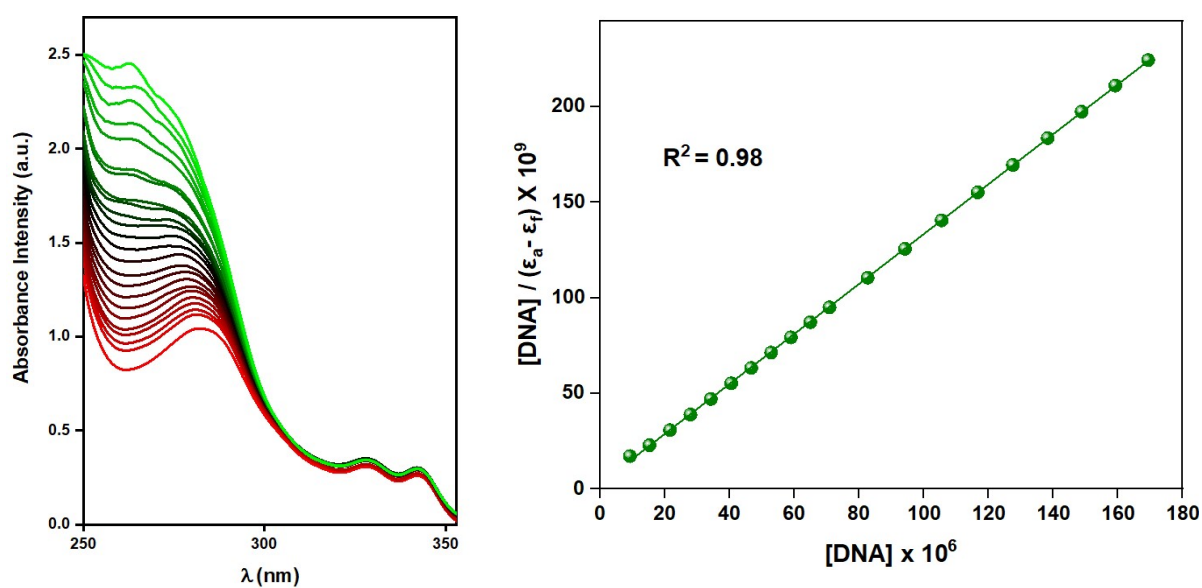

**Figure S52.** UV-Visible absorbance response of NiL4 ( $1.0 \times 10^{-5}$ ) at pH 7.2 in 5 mM Tris-HCl-NaCl buffer solution in the presence of incremental addition of CT-DNA

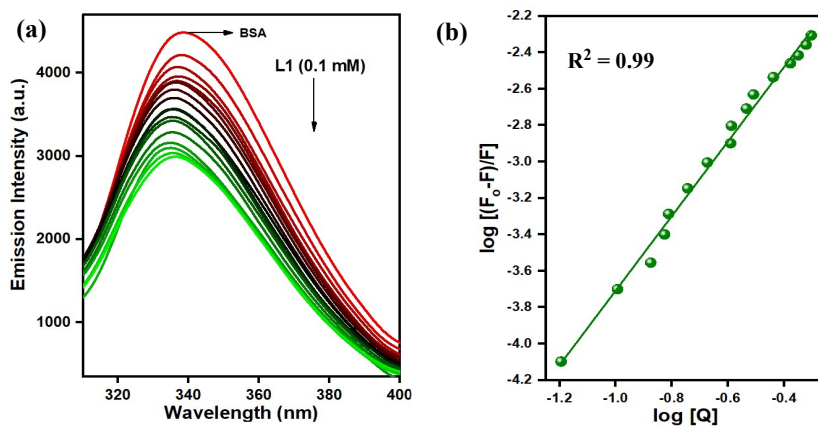

Figure S53 Binding parameters of interaction of the ligand (L1) with BSA

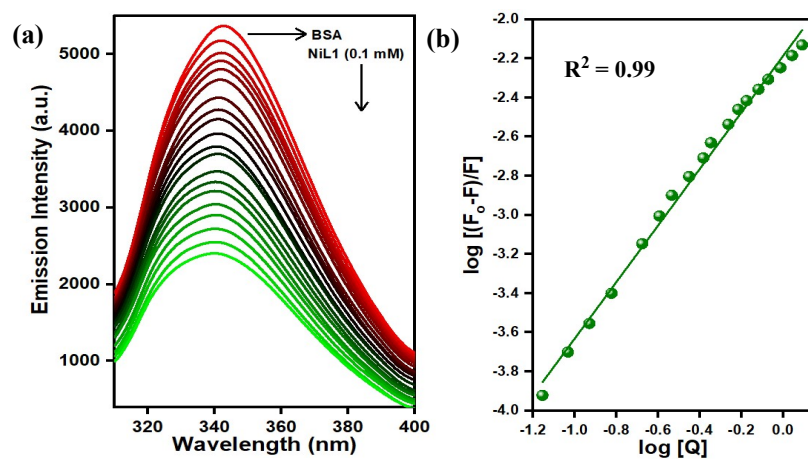

Figure S54 Binding parameters of interaction of the ligand (NiL1) with BSA

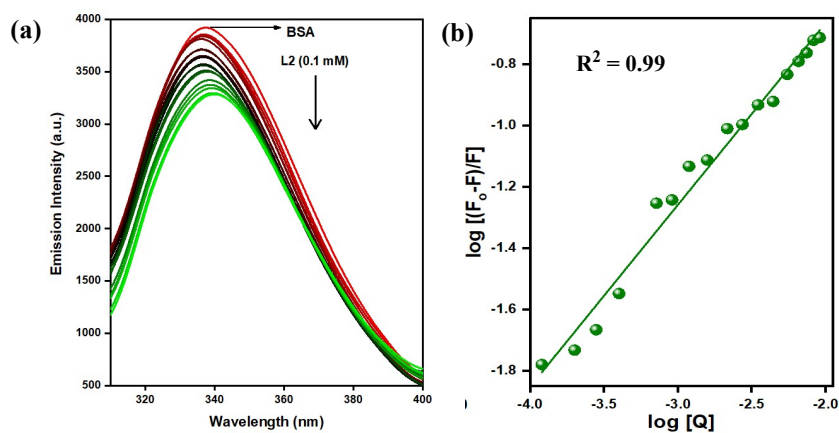

Figure S55 Binding parameters of interaction of the ligand (L2) with BSA



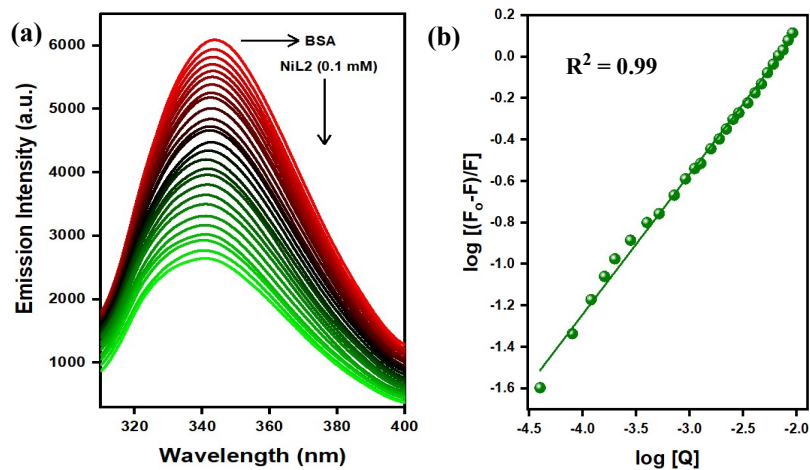

Figure S56 Binding parameters of interaction of the ligand (NiL2) with BSA

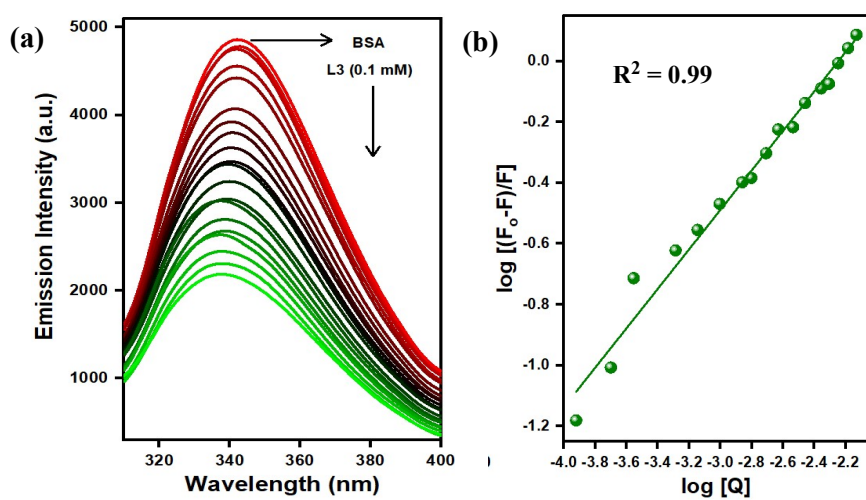

Figure S57 Binding parameters of interaction of the ligand (L3) with BSA

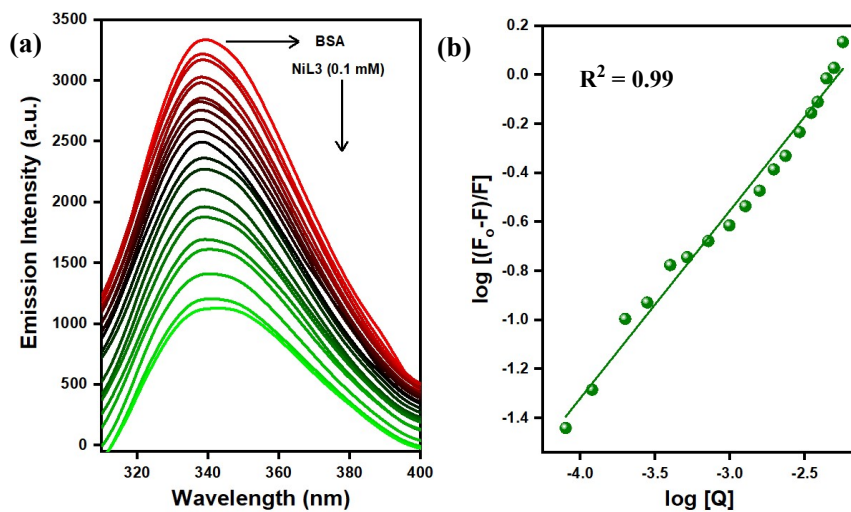

Figure S58 Binding parameters of interaction of the ligand (NiL3) with BSA

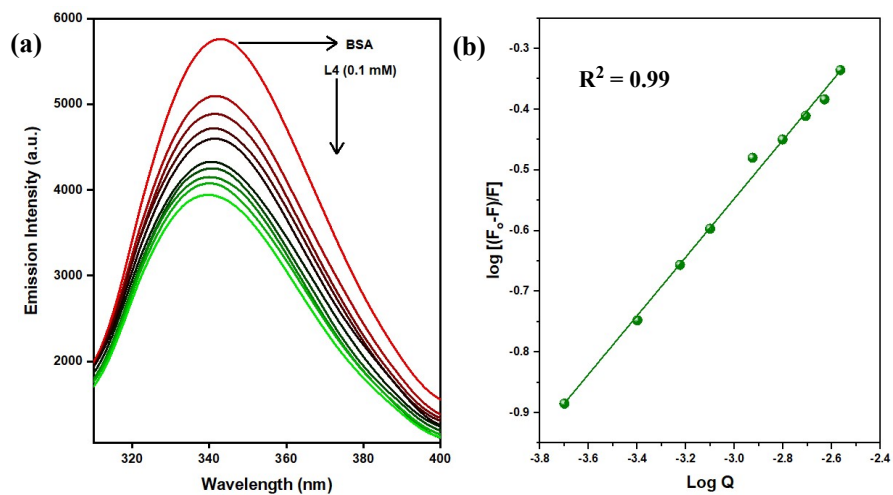

**Figure S59** Binding parameters of interaction of the ligand (L4) with BSA

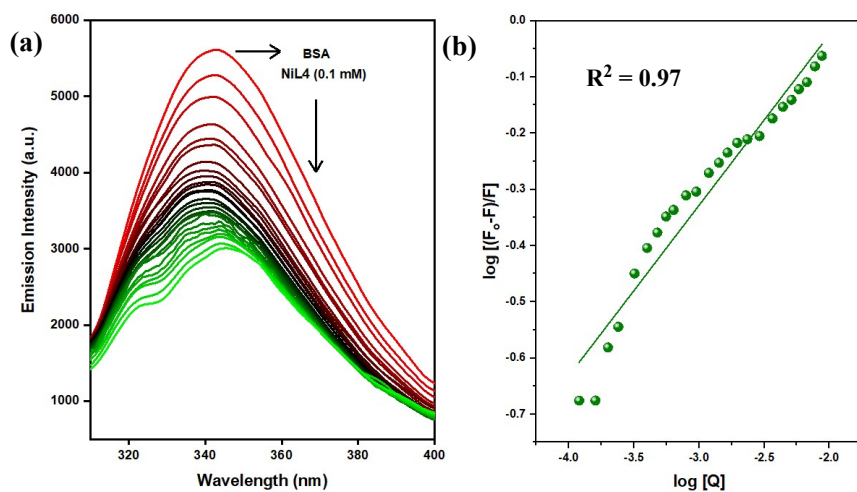

**Figure S60** Binding parameters of interaction of the ligand (NiL4) with BSA



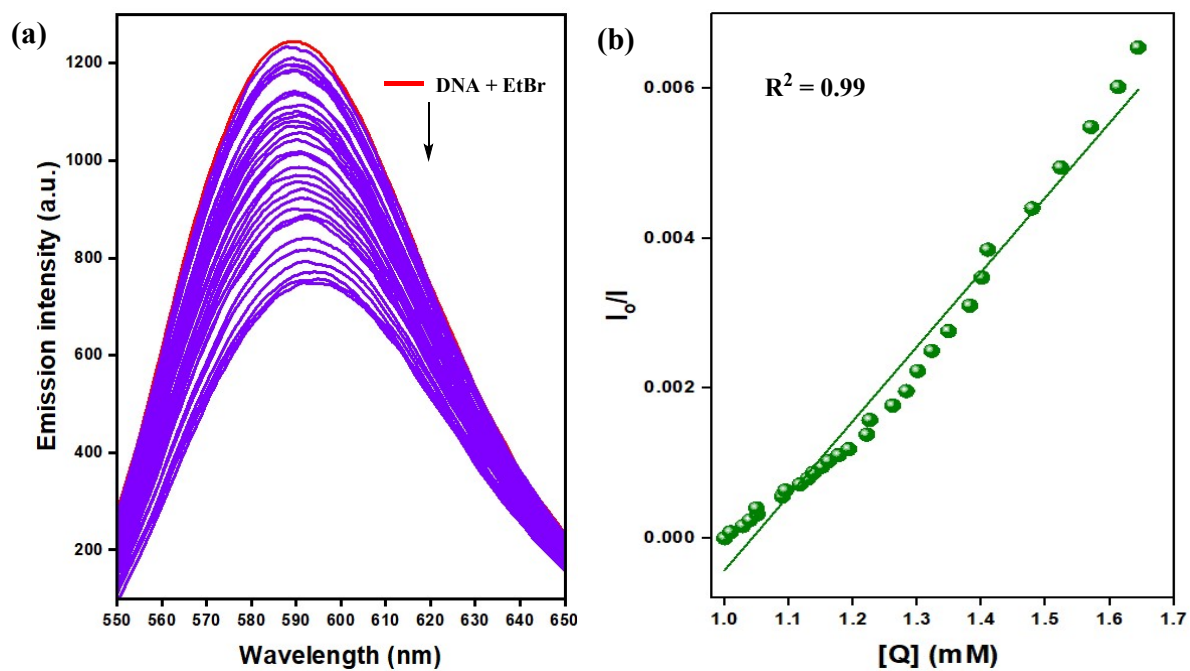

**Figure S61** Fluorescence spectral response of the EtBr-DNA at pH 7.2 in the presence of L1

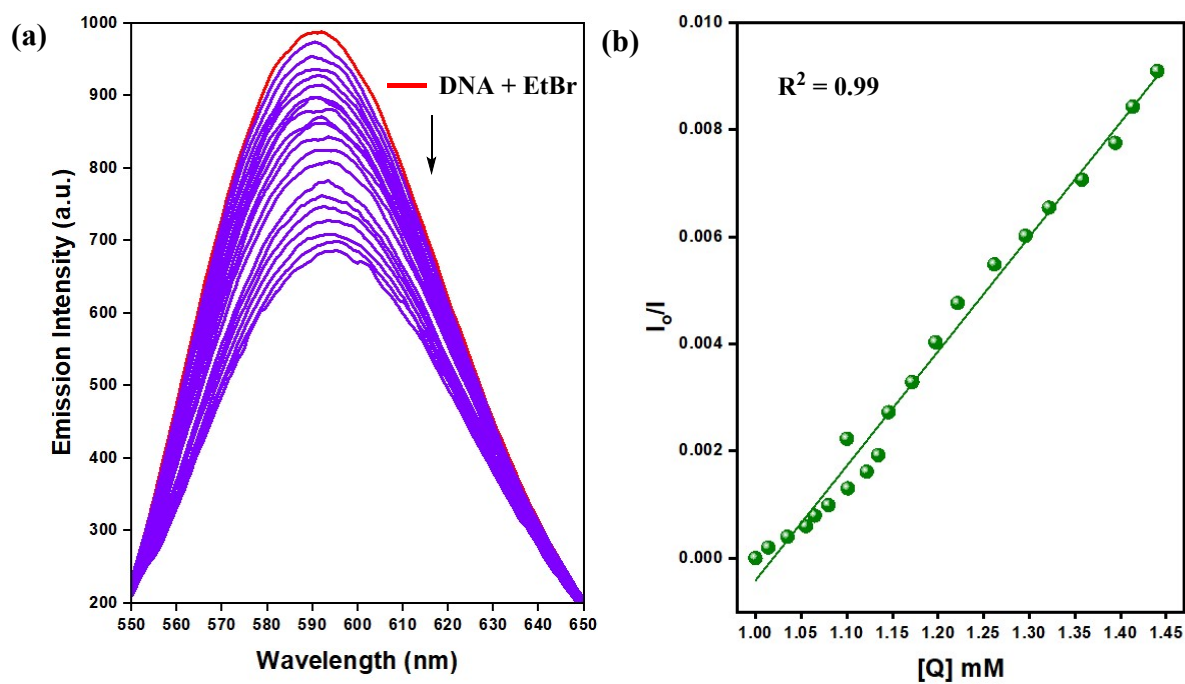

**Figure S62** Fluorescence spectral response of the EtBr-DNA at pH 7.2 in the presence of NiL1

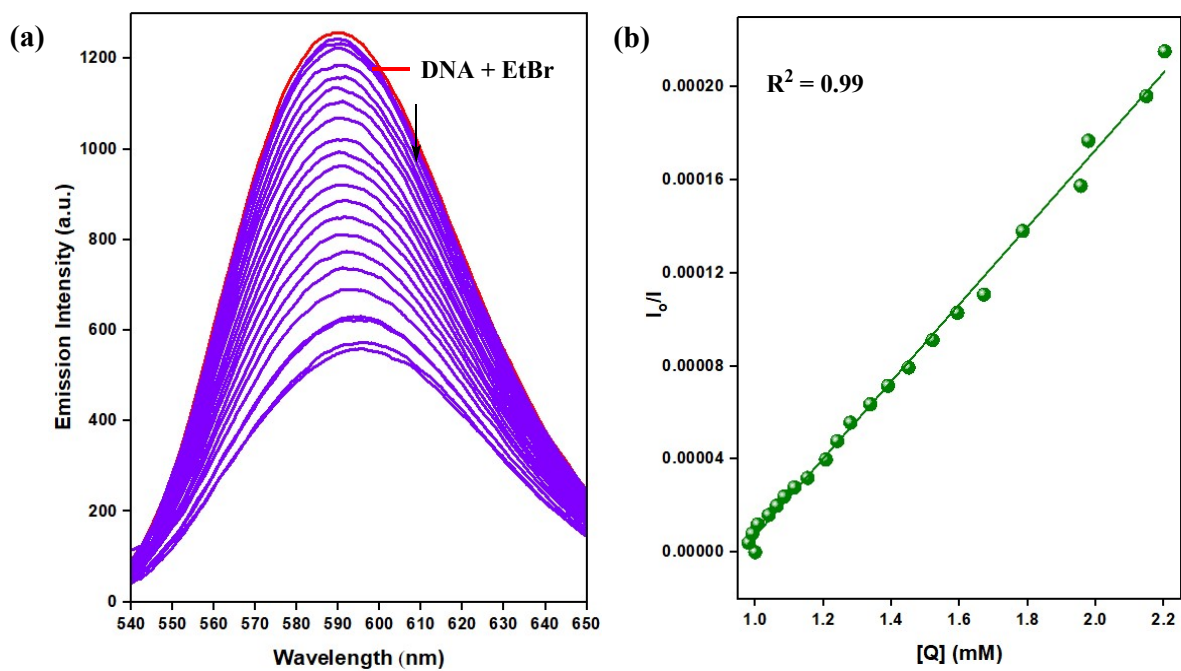

**Figure S63** Fluorescence spectral response of the EtBr-DNA at pH 7.2 in the presence of L2

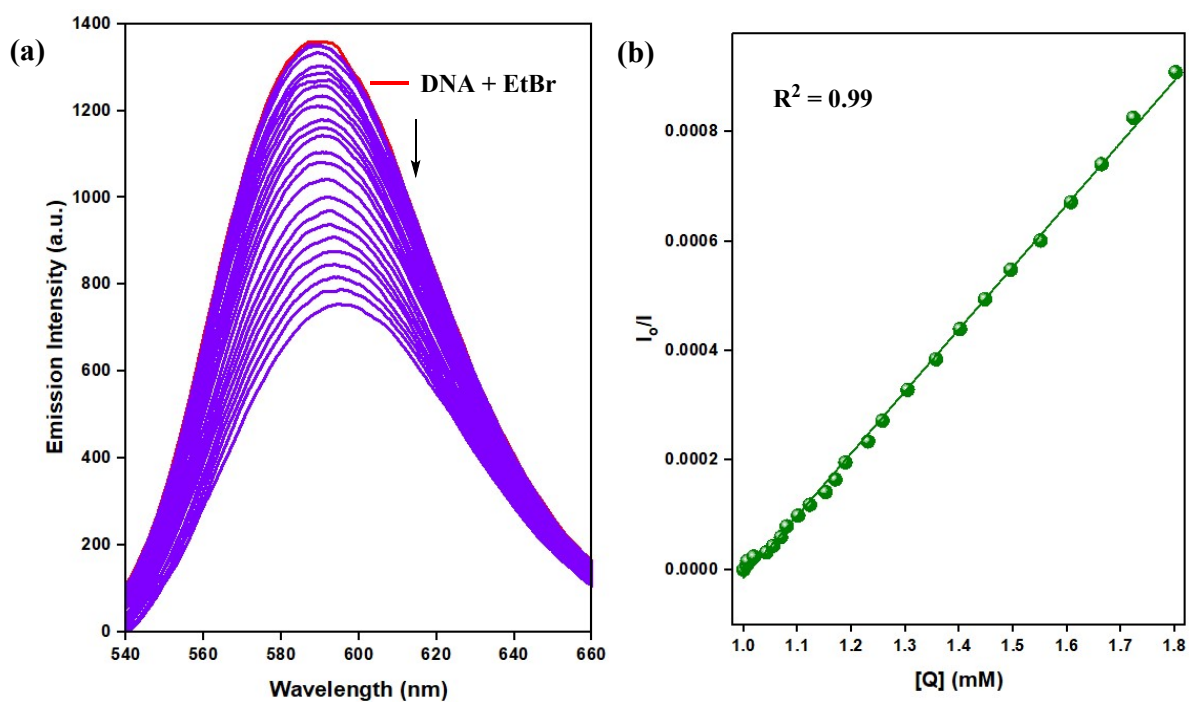

**Figure S64** Fluorescence spectral response of the EtBr-DNA at pH 7.2 in the presence of NiL2

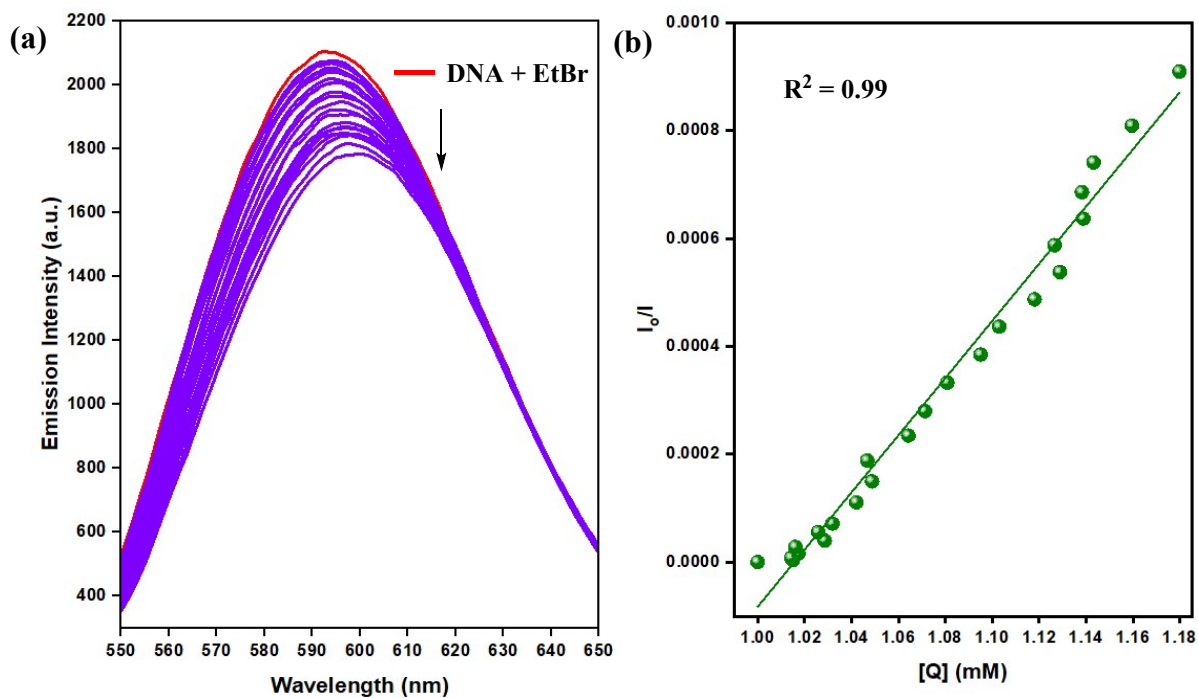

**Figure S65** Fluorescence spectral response of the EtBr-DNA at pH 7.2 in the presence of **L3**

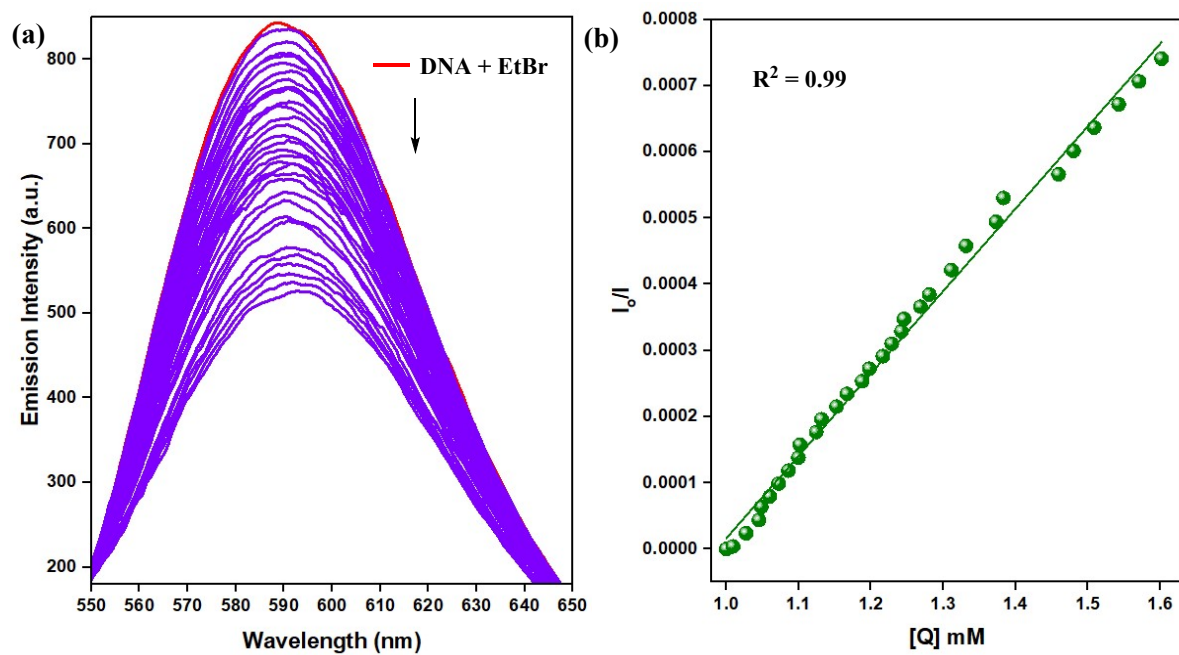

**Figure S66** Fluorescence spectral response of the EtBr-DNA at pH 7.2 in the presence of **NiL3**

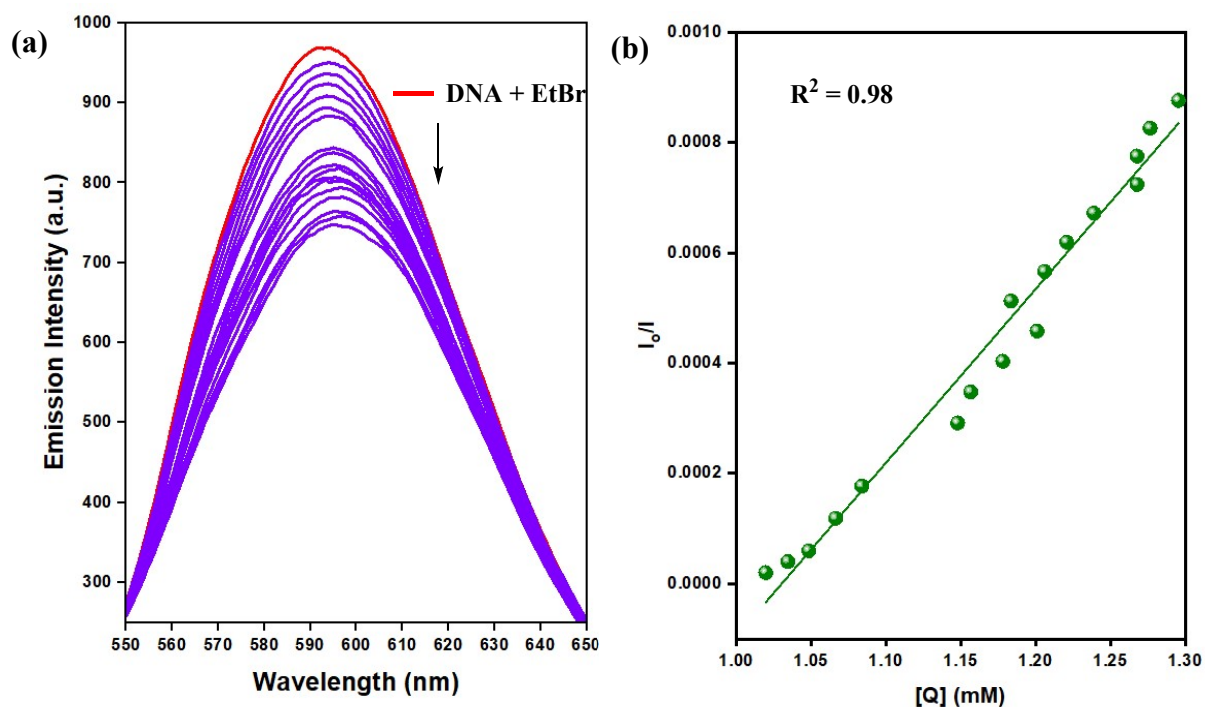

Figure S67 Fluorescence spectral response of the EtBr-DNA at pH 7.2 in the presence of L4

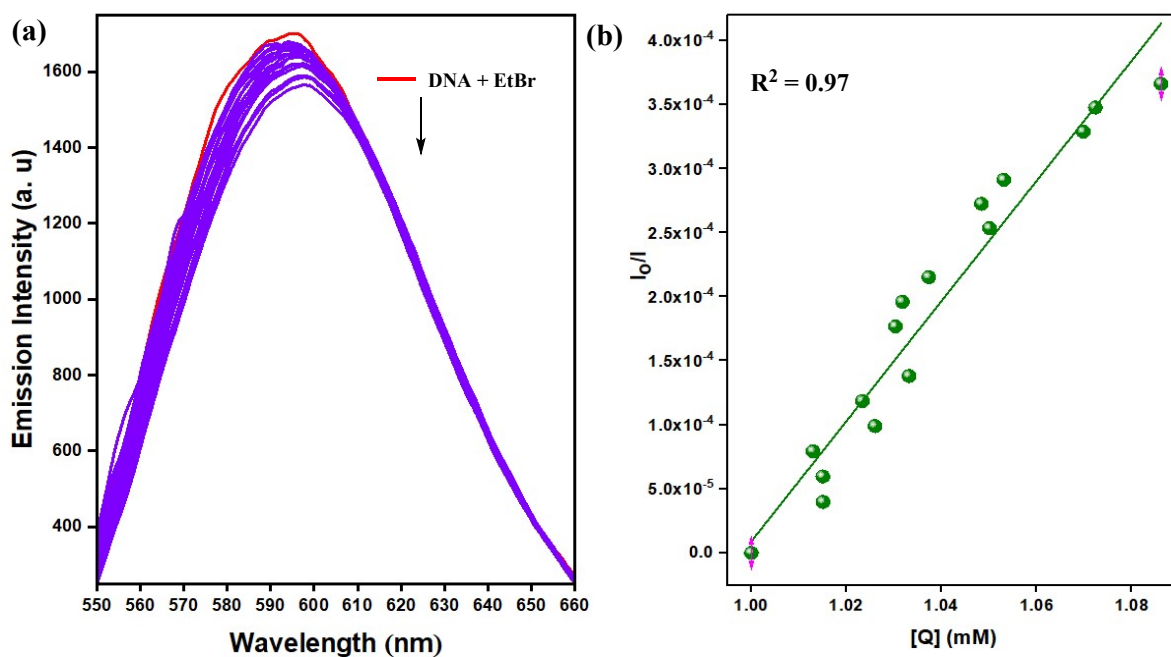

Figure S68 Fluorescence spectral response of the EtBr-DNA at pH 7.2 in the presence of NiL4

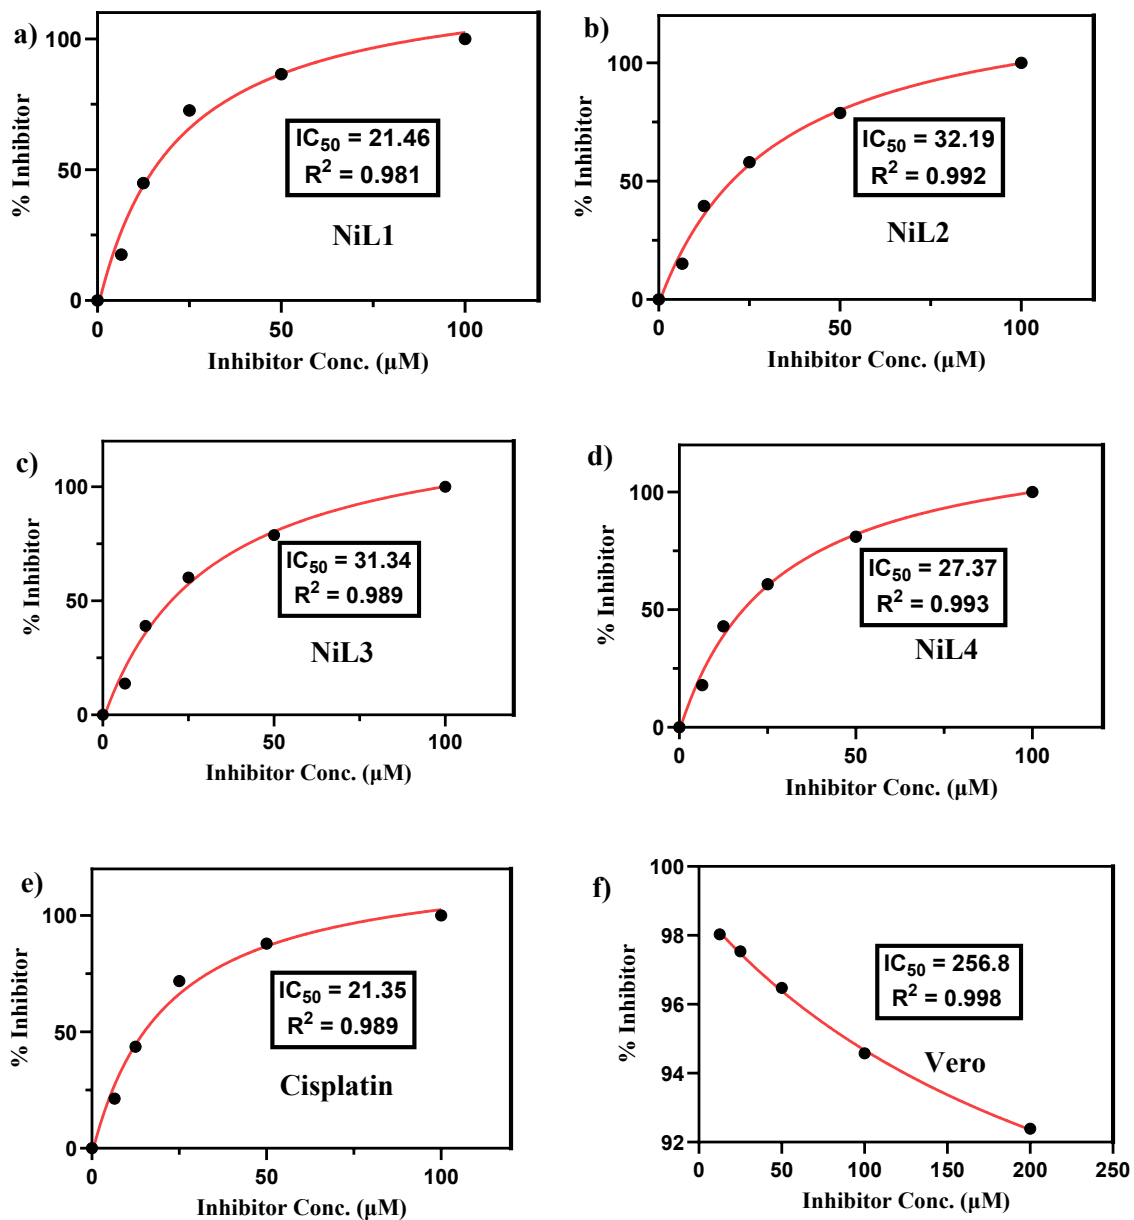

**Figure S69.** Sigmoidal plot for finding the  $IC_{50}$  Values of the Ni(II) complexes NiL1-NiL4 (In order a-d) and using the standard drug Cisplatin (e) using Hep-G2 cell line. f) Sigmoidal plot for the Vero cell line.

**Table S2.** Crystallographic data refinement details of the ligand **L4** and the Ni(II) complex **NiL4**

| Identification code       | <b>L4</b>                                                         | <b>NiL4</b>                                                                       |
|---------------------------|-------------------------------------------------------------------|-----------------------------------------------------------------------------------|
| Empirical formula         | C <sub>26</sub> H <sub>16</sub> ClN <sub>3</sub> O <sub>2</sub> S | C <sub>28</sub> H <sub>22</sub> Cl <sub>3</sub> N <sub>3</sub> NiO <sub>4</sub> S |
| Formula weight (g/mol)    | 469.93                                                            | 661.60                                                                            |
| Temperature/K             | 300.00                                                            | 300.00                                                                            |
| Crystal system            | Triclinic                                                         | Monoclinic                                                                        |
| Space group               | P-1                                                               | P2 <sub>1</sub> /n                                                                |
| a (Å)                     | 8.238(2)                                                          | 7.4934(11)                                                                        |
| b (Å)                     | 10.517(3)                                                         | 26.809(4)                                                                         |
| c (Å)                     | 13.479(4)                                                         | 14.499(2)                                                                         |
| α (Å)                     | 96.239(10)                                                        | 90                                                                                |
| β (Å)                     | 102.378(10)                                                       | 92.652(5)                                                                         |
| γ (Å)                     | 99.049(10)                                                        | 90                                                                                |
| Volume/ Å <sup>3</sup>    | 1114.1(5)                                                         | 2909.7(7)                                                                         |
| Z                         | 2                                                                 | 4                                                                                 |
| P (calc)g/cm <sup>3</sup> | 1.401                                                             | 1.510                                                                             |
| θ for data collection     | 4.674 to 56.54                                                    | 4.14 to 52.736                                                                    |
| Reflections collected     | 49070                                                             | 36563                                                                             |
| Independent reflections   | 5464                                                              | 5934                                                                              |
| GOF on F <sup>2</sup>     | 1.058                                                             | 1.036                                                                             |
| R1 [I>2σ]                 | 0.0453                                                            | 0.0551                                                                            |
| wR2 [F <sup>2</sup> ]     | 0.0867                                                            | 0.1193                                                                            |
